# Supplementary material
Source: ML conference proceedings conference paper supplement (https://openreview.net/forum?id=wEoagacatn)
Supplement: supplementary_material [file attachment]

# Autoregressive Transformer

features  
 $f_1, \dots, f_L$

K,V

Masked Multi-Head Cross-Attention

Add, Norm

FFN

Add, Norm

Masked Multi-Head Self-Attention

$\times N_d$

V

K

Q

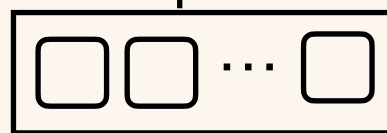

Begin

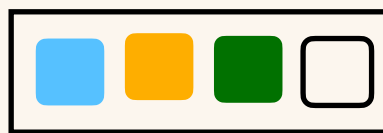

$h_1$

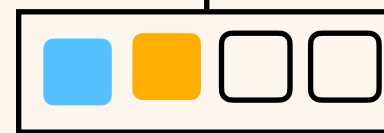

$h_2$

...

$h_j$
