# Supplementary material
Source: ML conference proceedings conference paper supplement (https://openreview.net/forum?id=wEoagacatn)
Supplement: supplementary_material [file attachment]

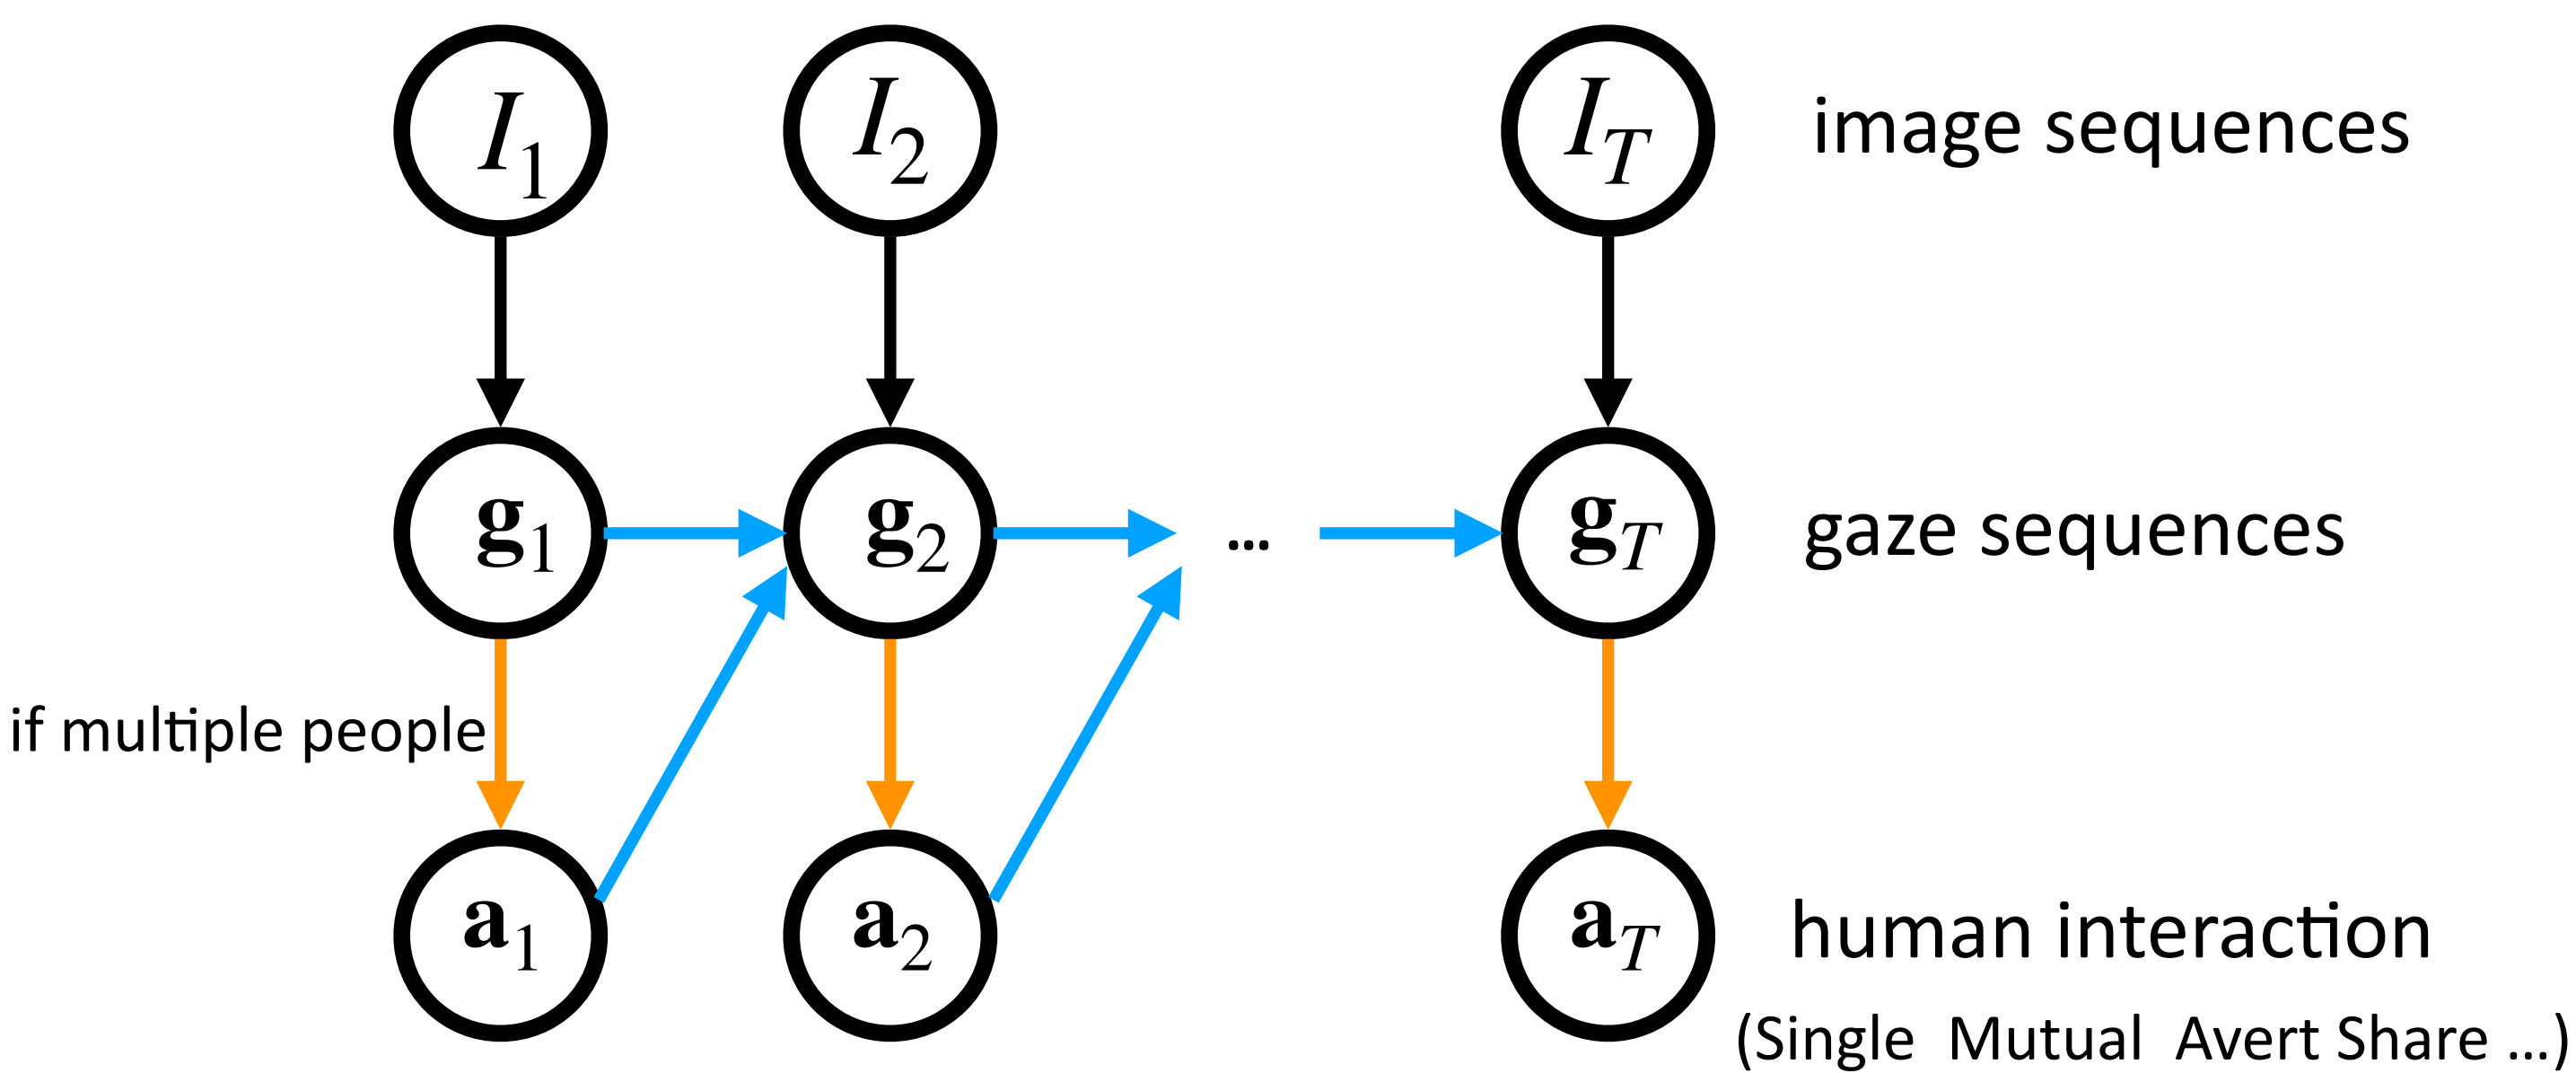

$$P(\mathbf{g}_{1:T}, \mathbf{a}_{1:T} | \mathbf{I}_{1:T}) =$$

$$P(\mathbf{g}_1 | I_1) P(\mathbf{a}_1 | \mathbf{g}_1) \prod_{t=1}^{T-1} \{$$

$$P(\mathbf{g}_{t+1} | \mathbf{g}_t, \mathbf{a}_t, I_{t+1}) P(\mathbf{a}_{t+1} | \mathbf{g}_{t+1}) \}$$

$\downarrow$   
**temporal gaze relationship**

$\downarrow$   
**spatial gaze interaction**
