# Supplementary material
Source: ML conference proceedings conference paper supplement (https://openreview.net/forum?id=wEoagacatn)

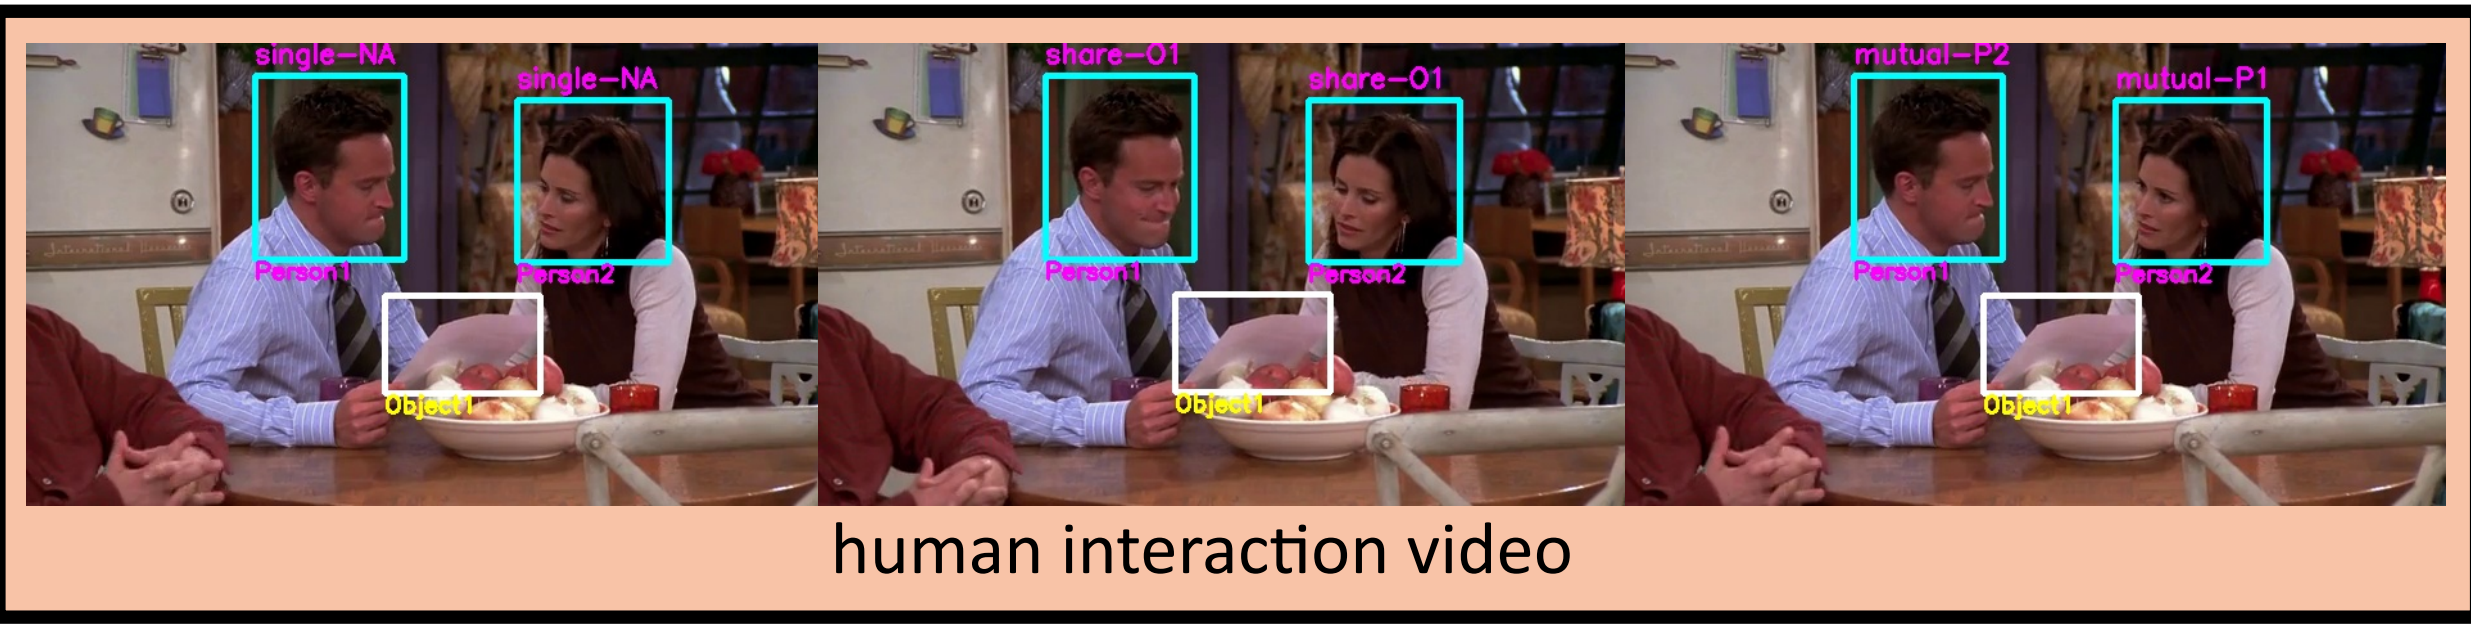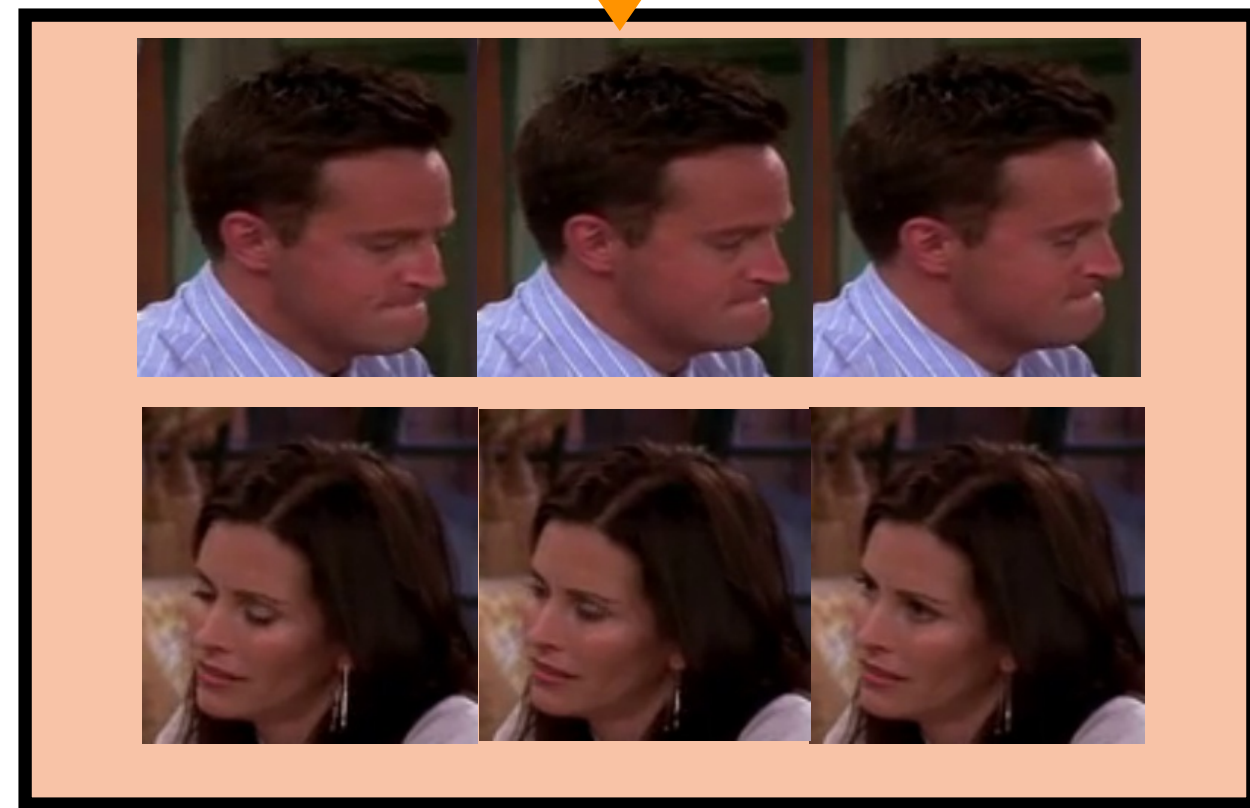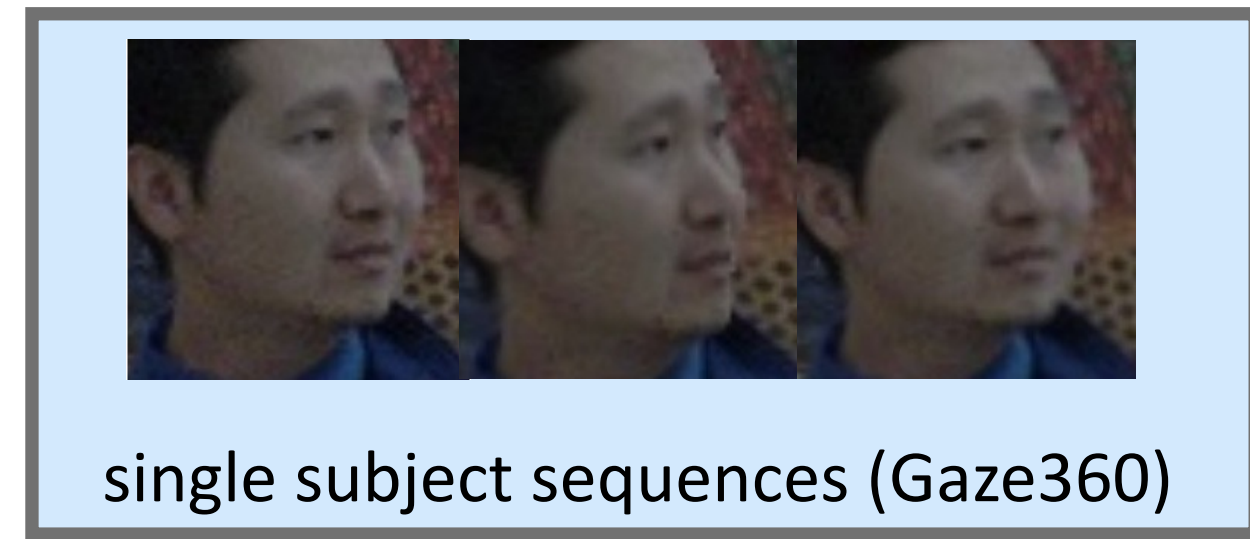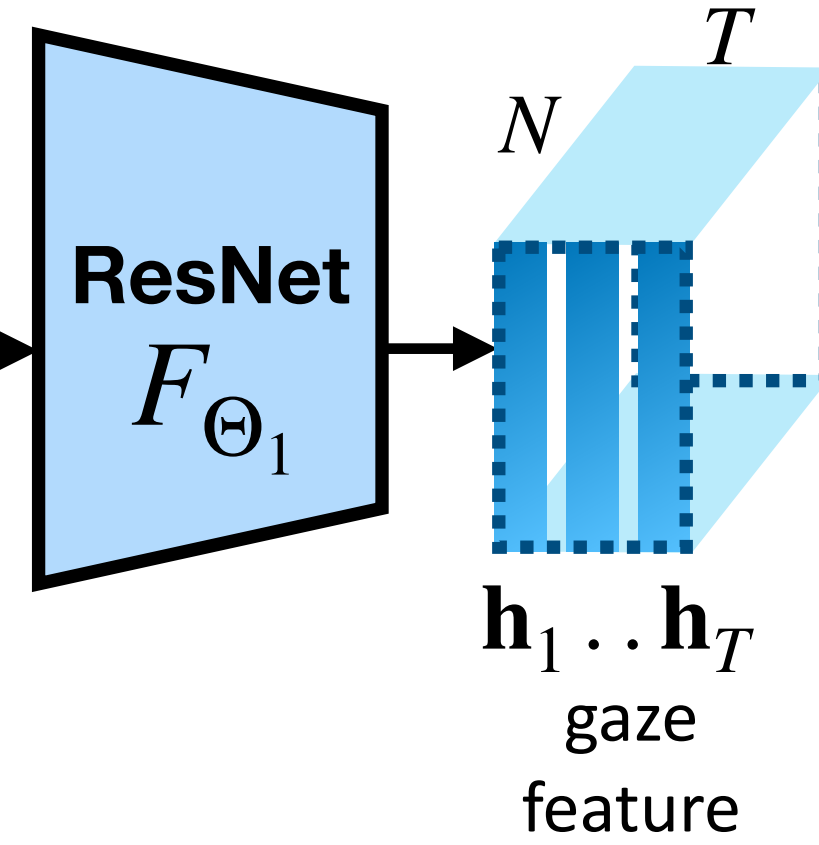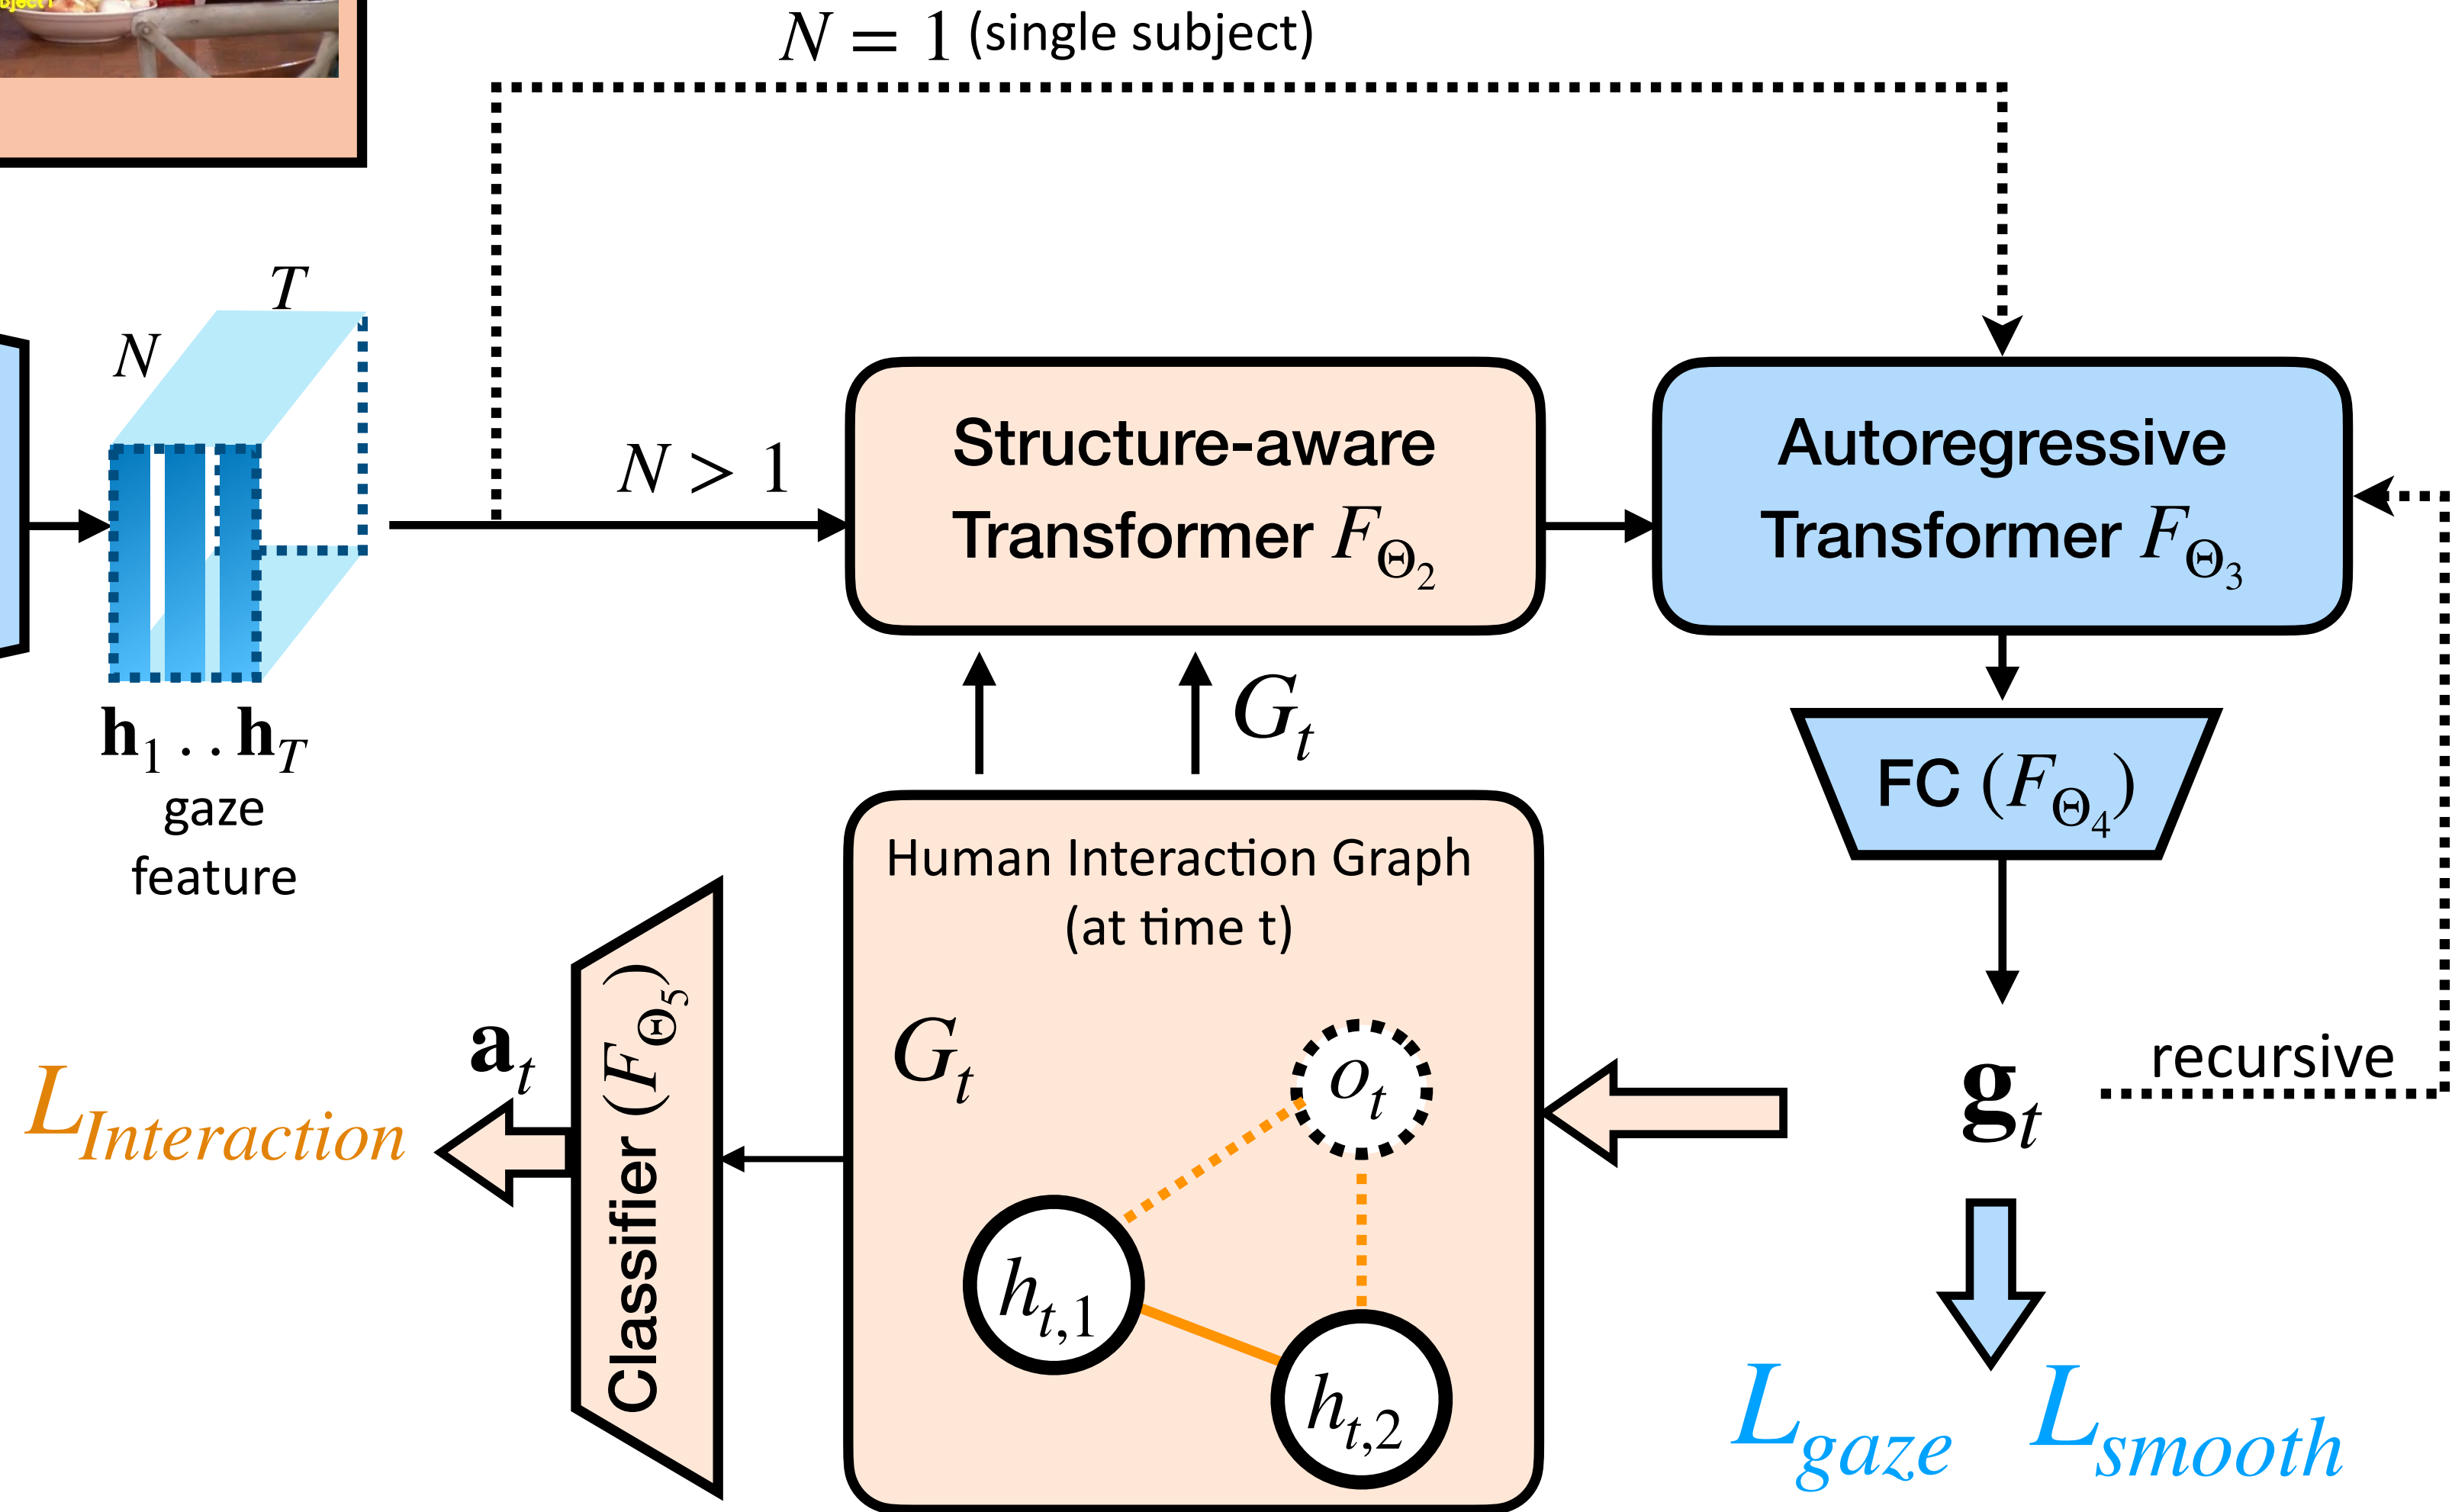

Supplement: supplementary_material [file attachment]

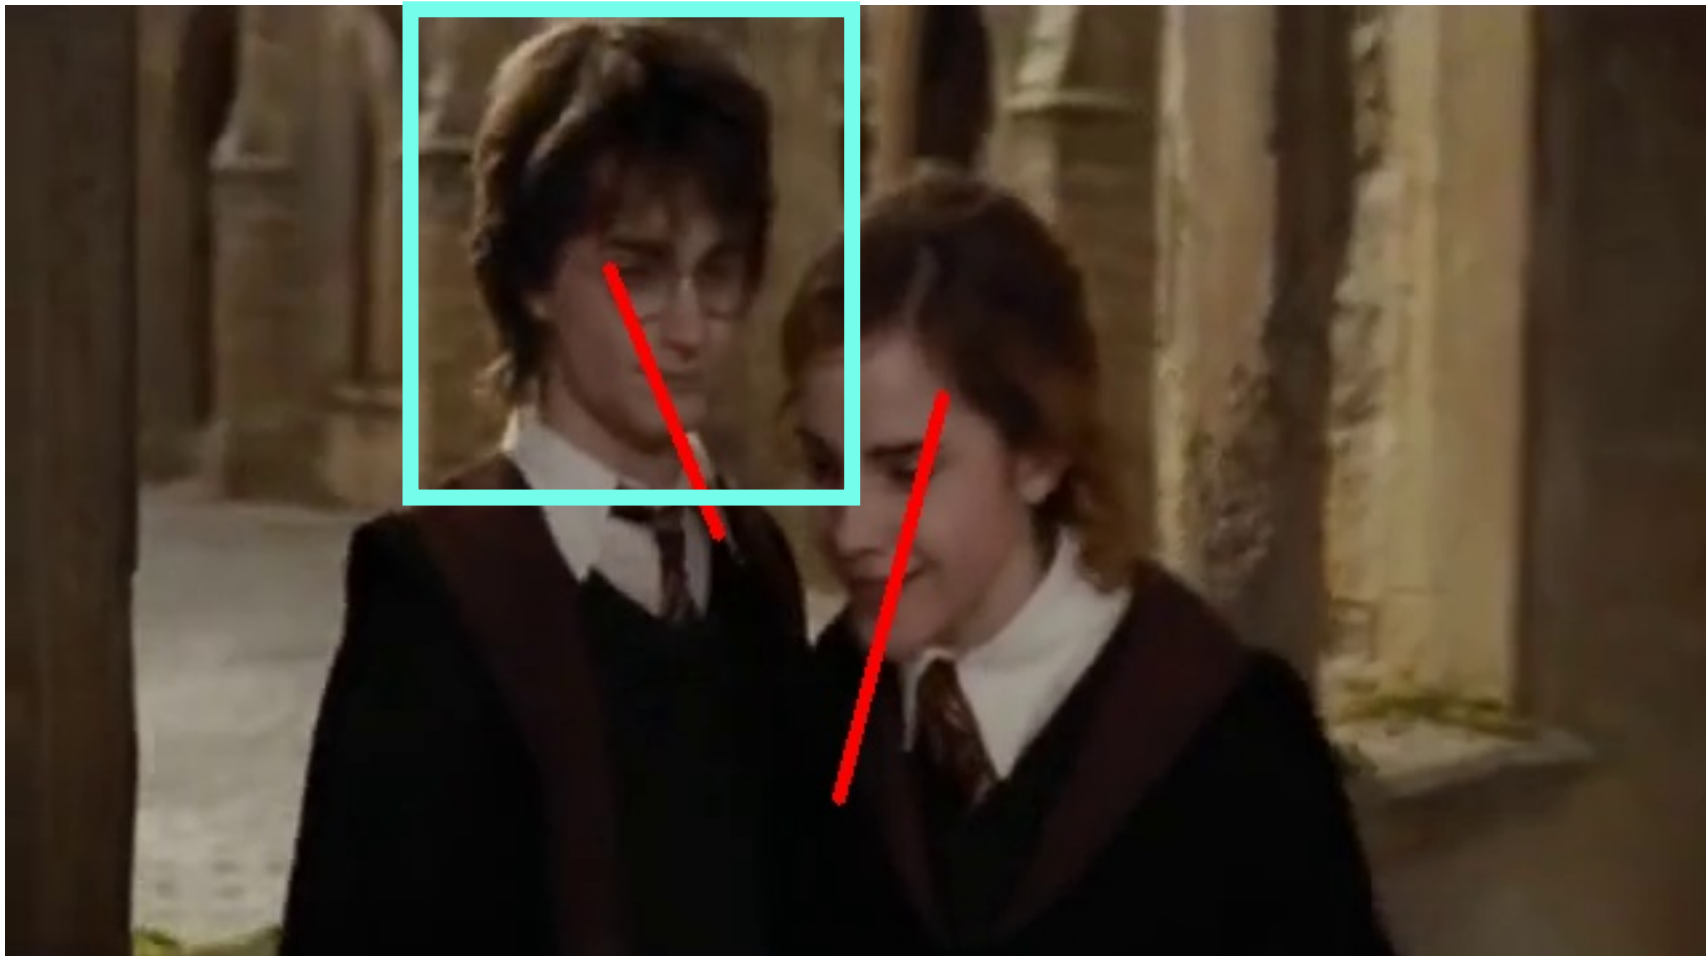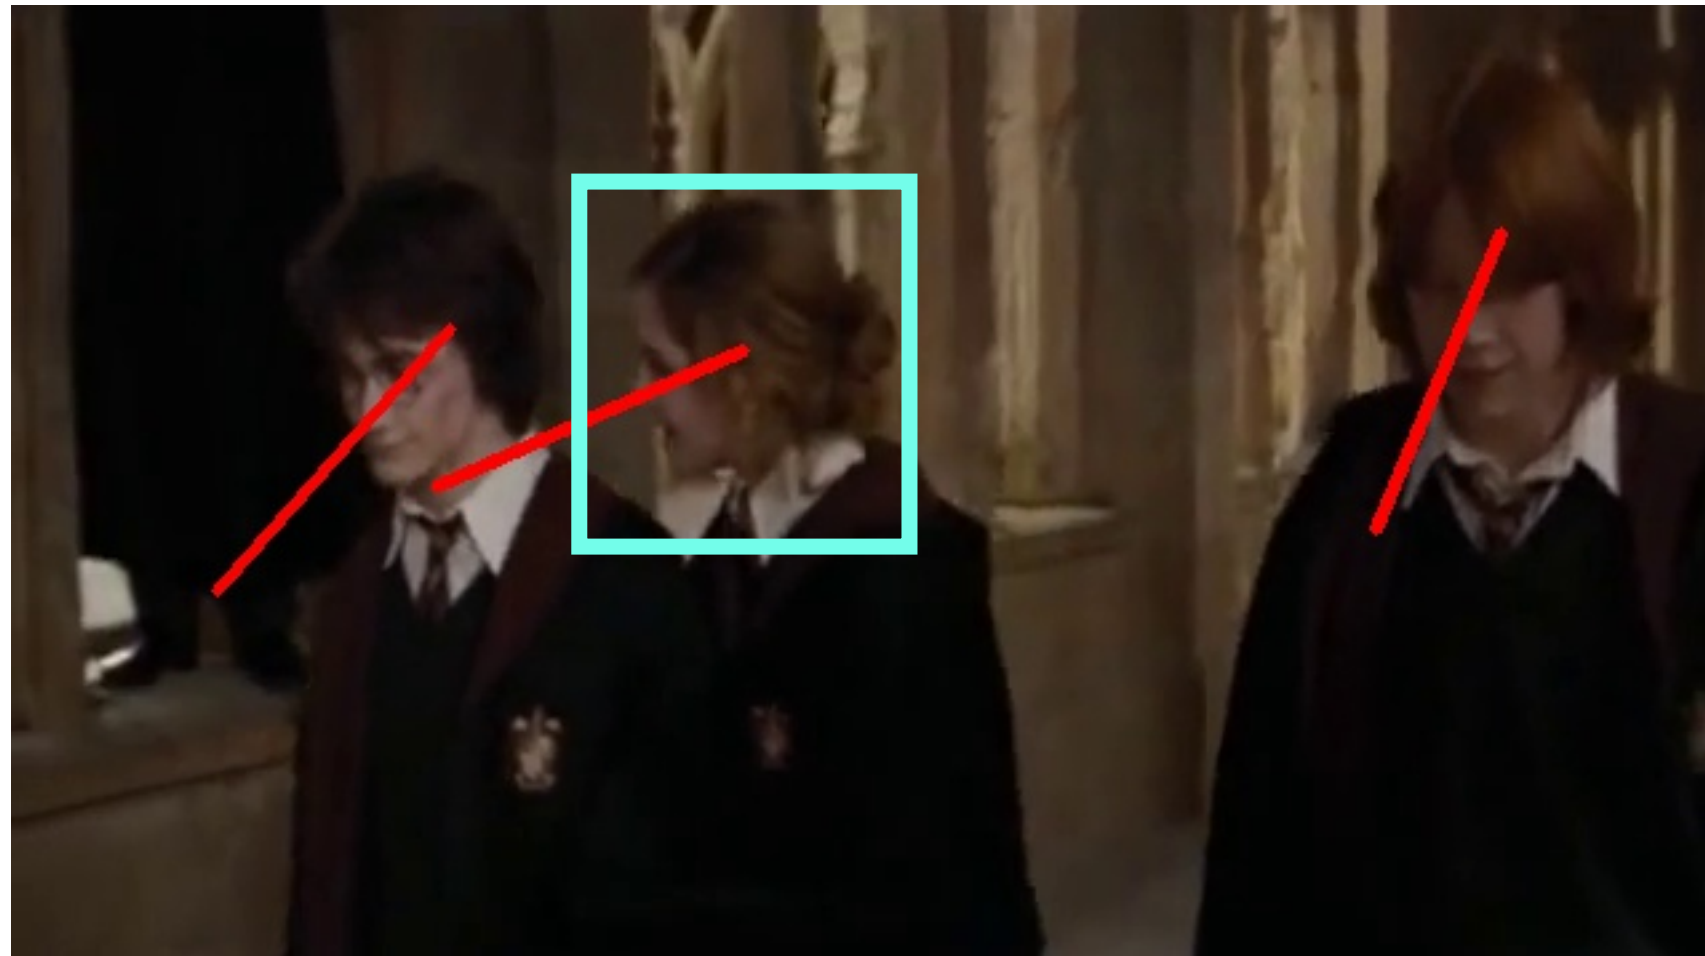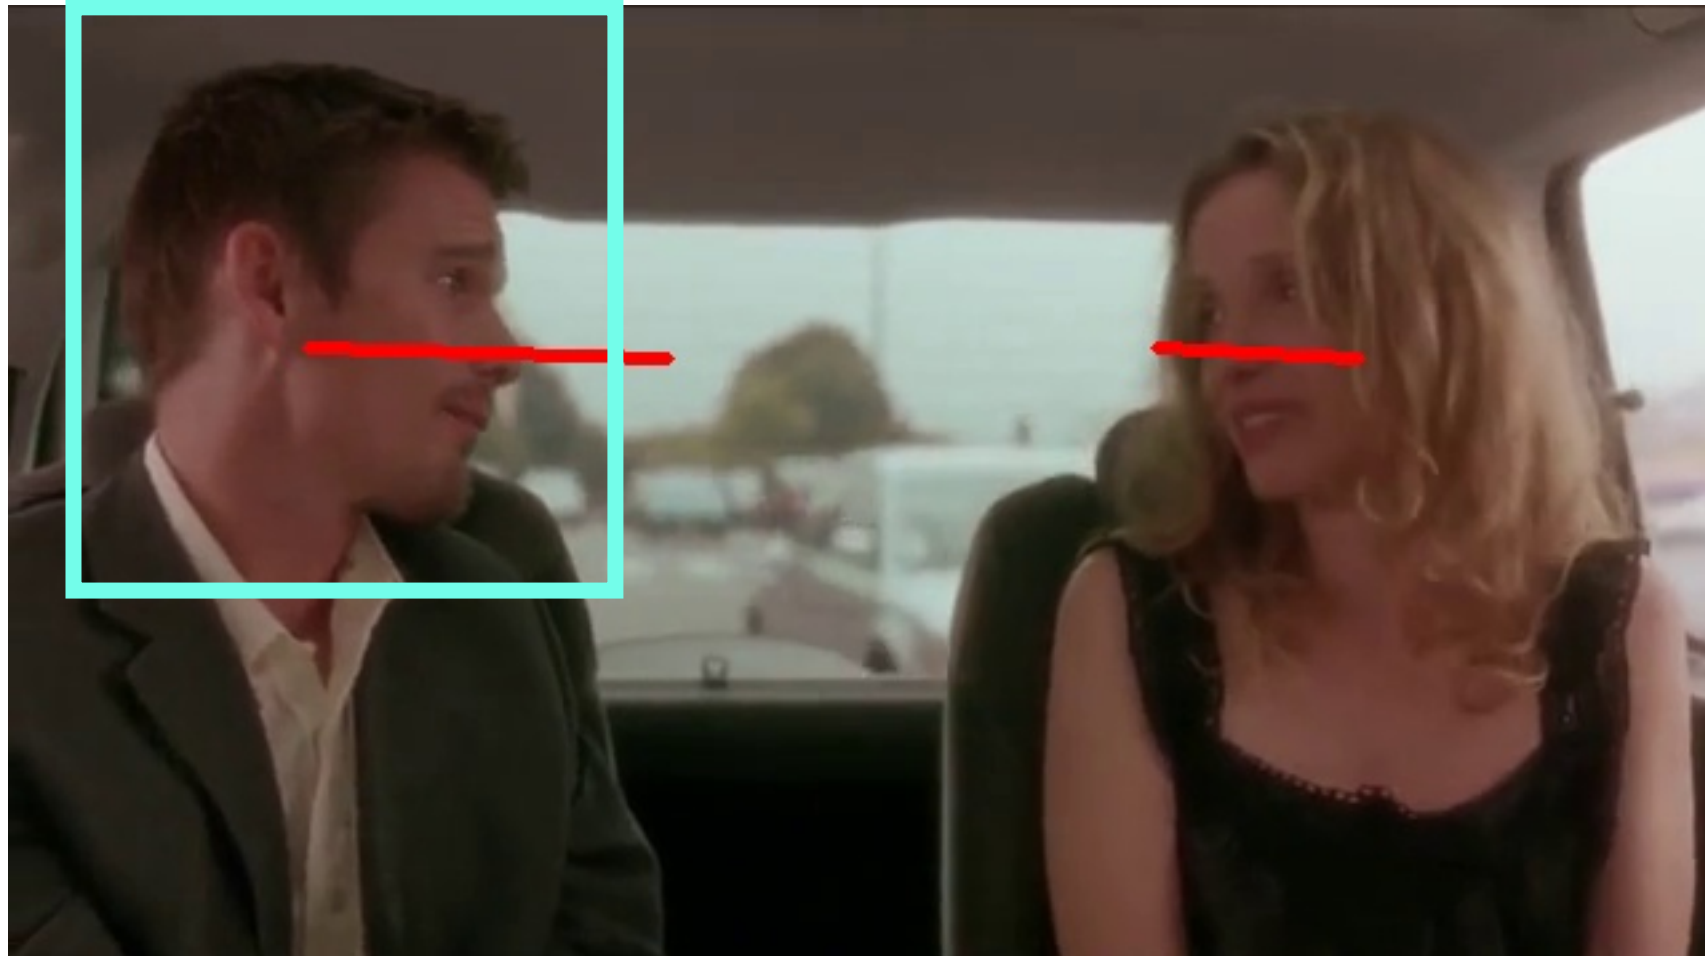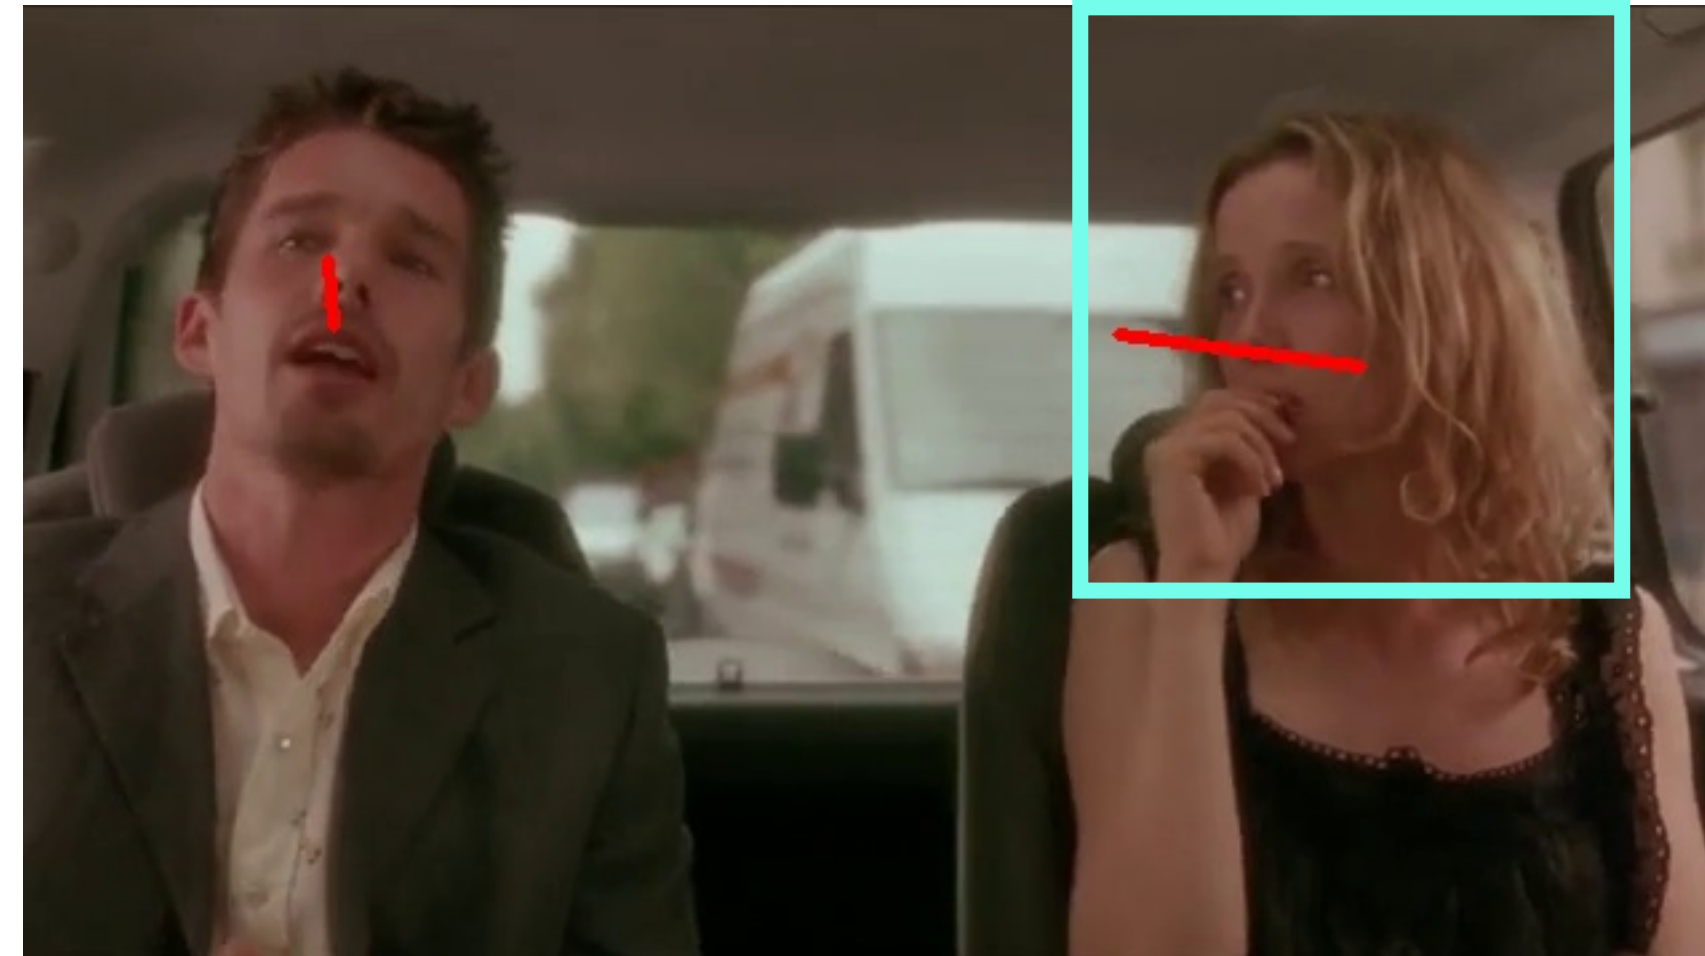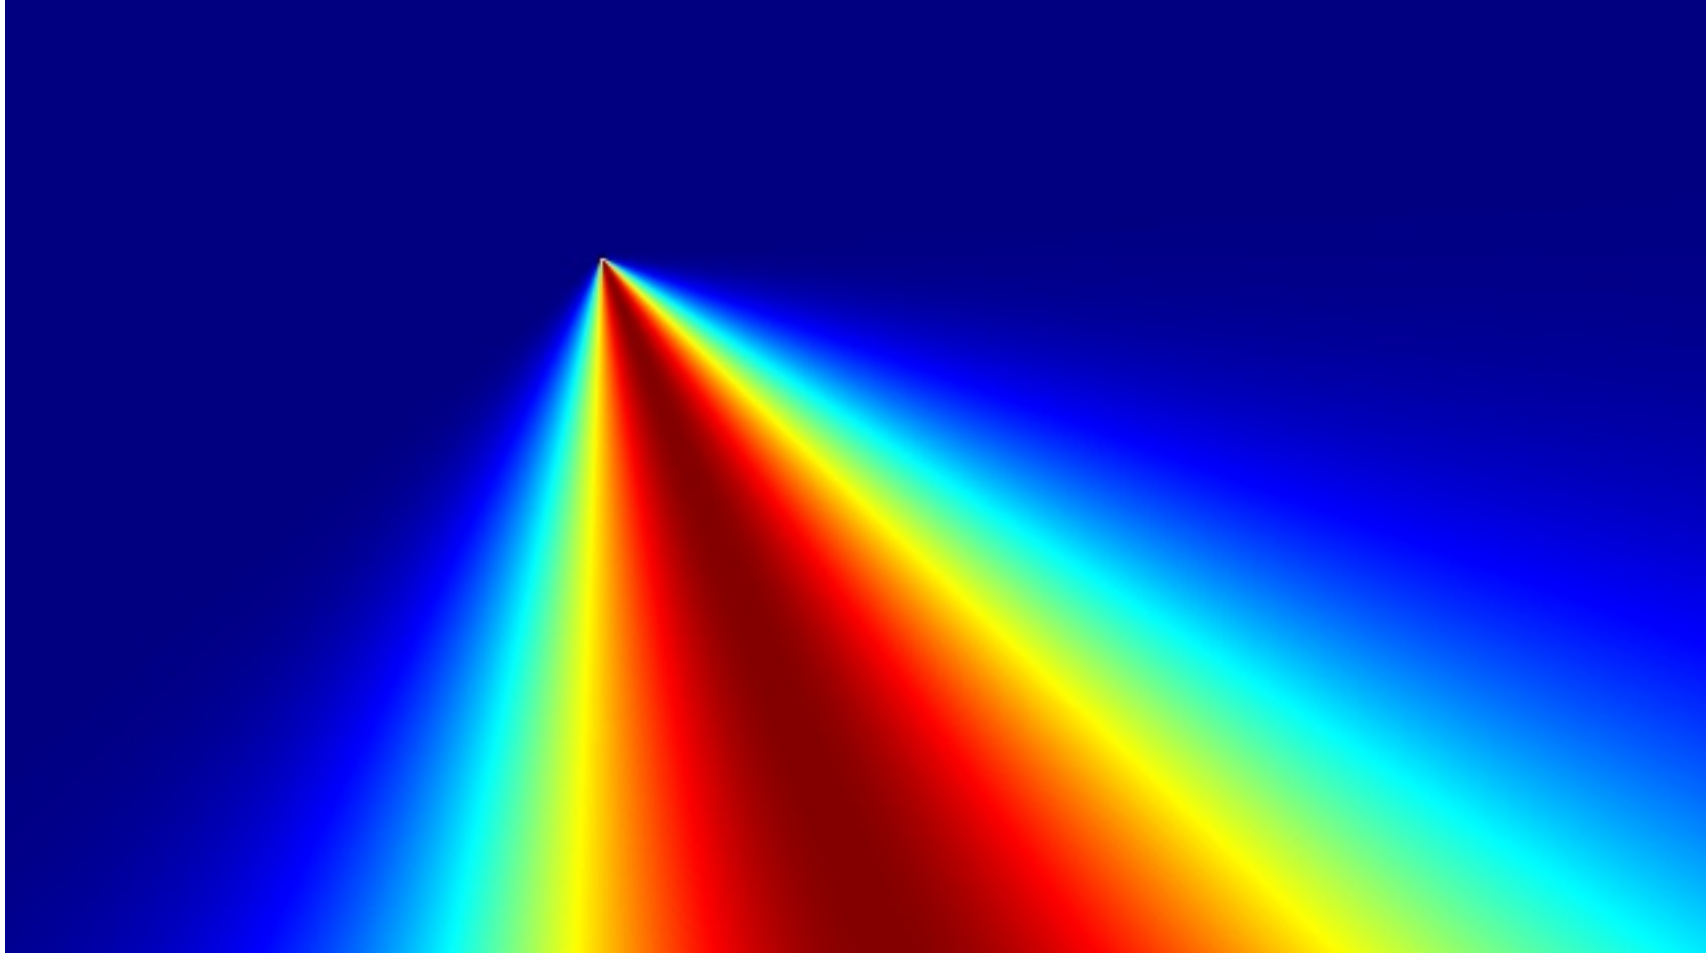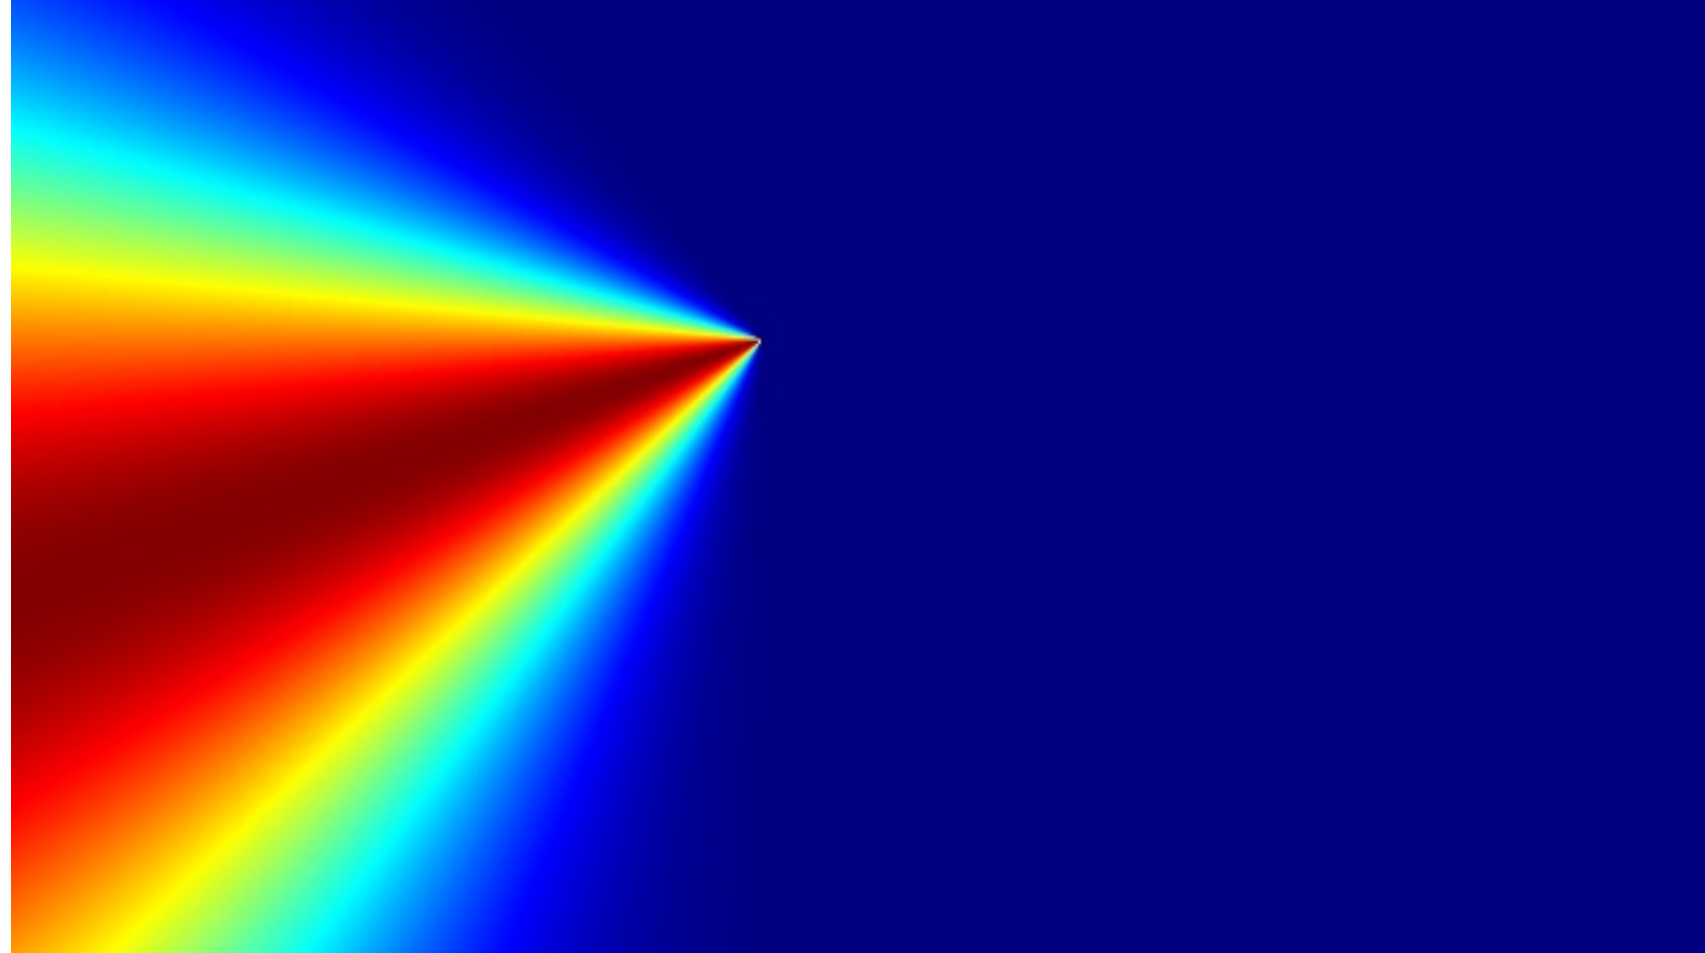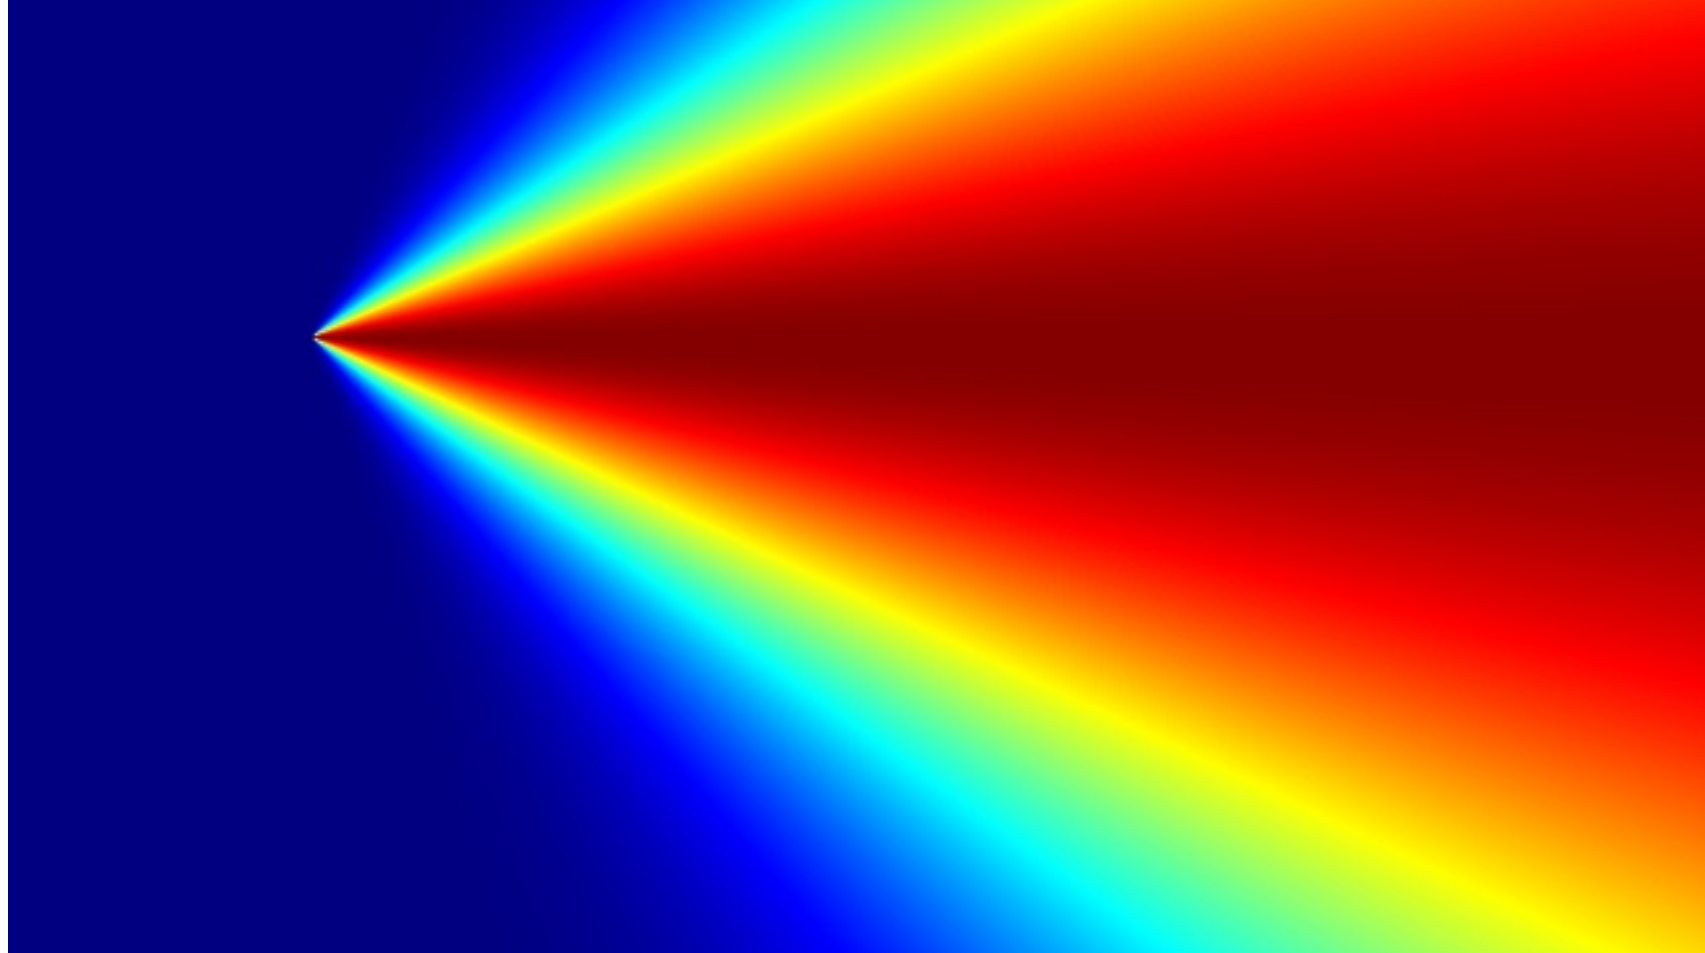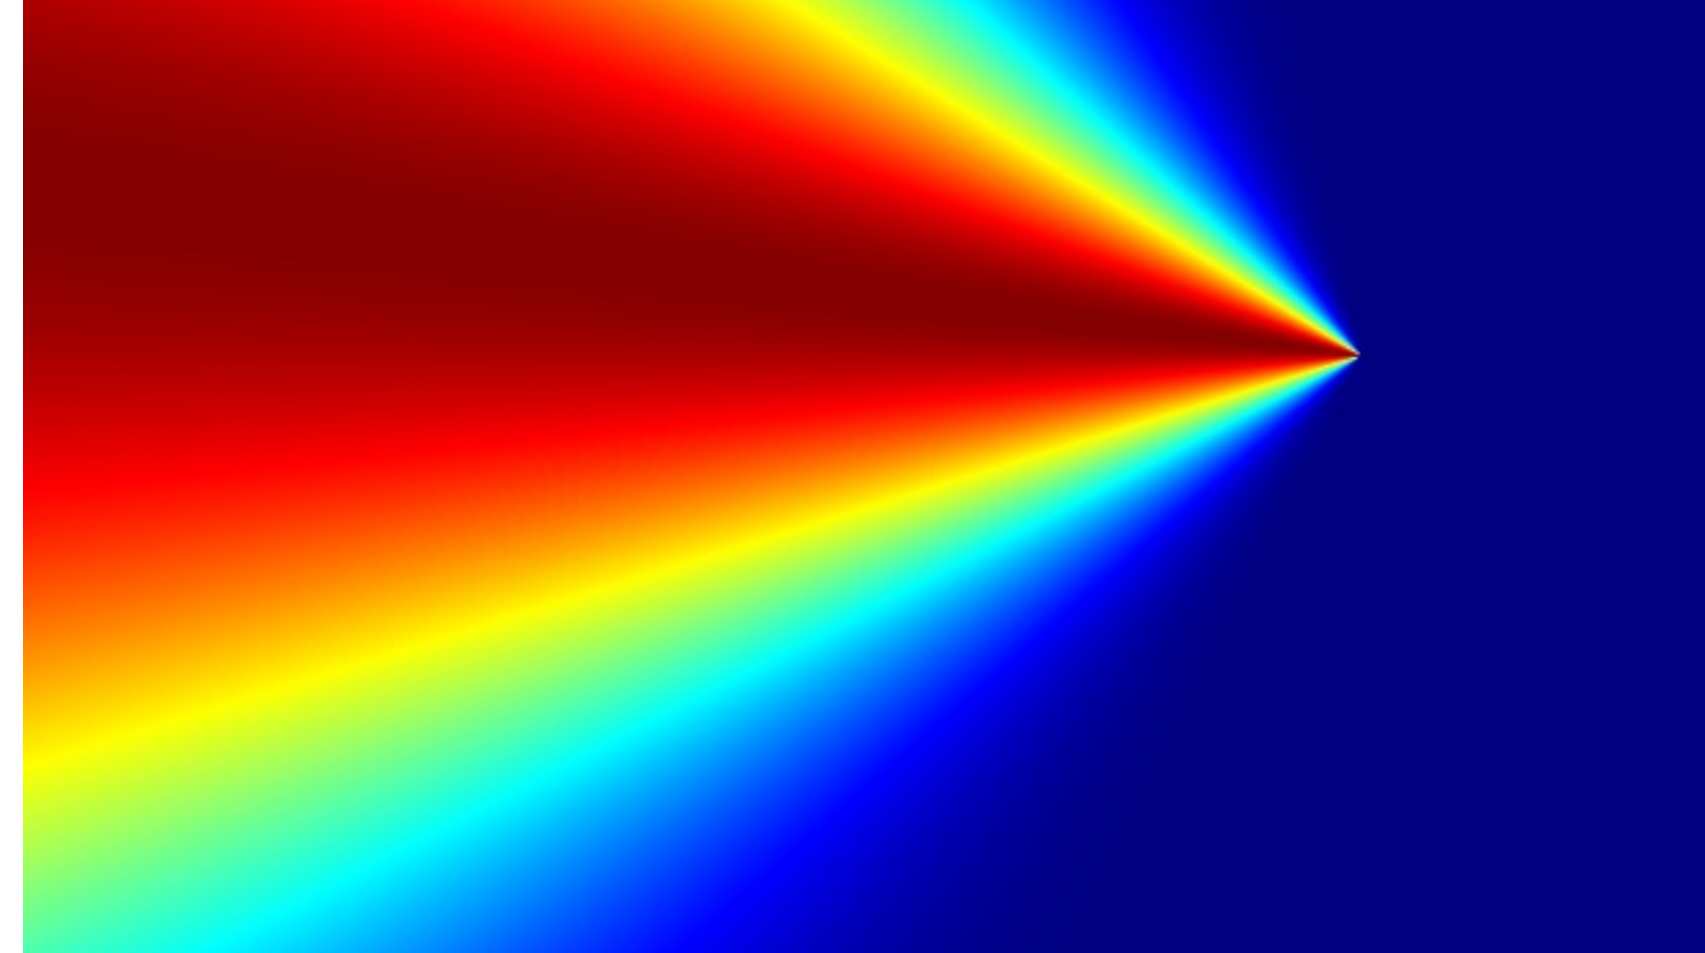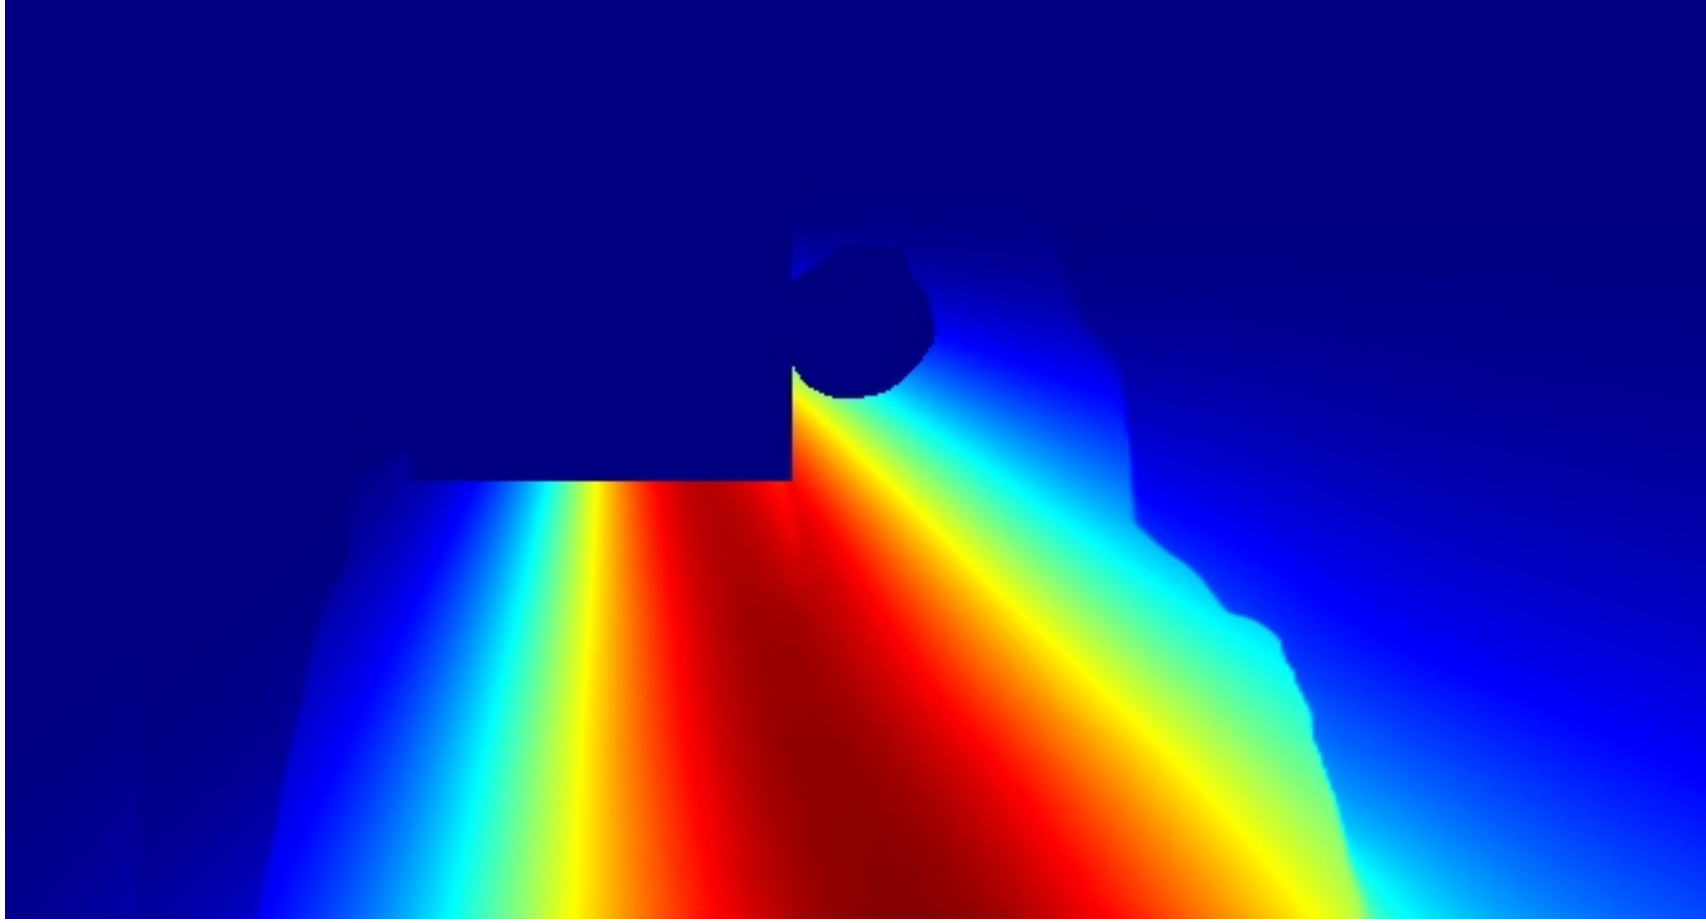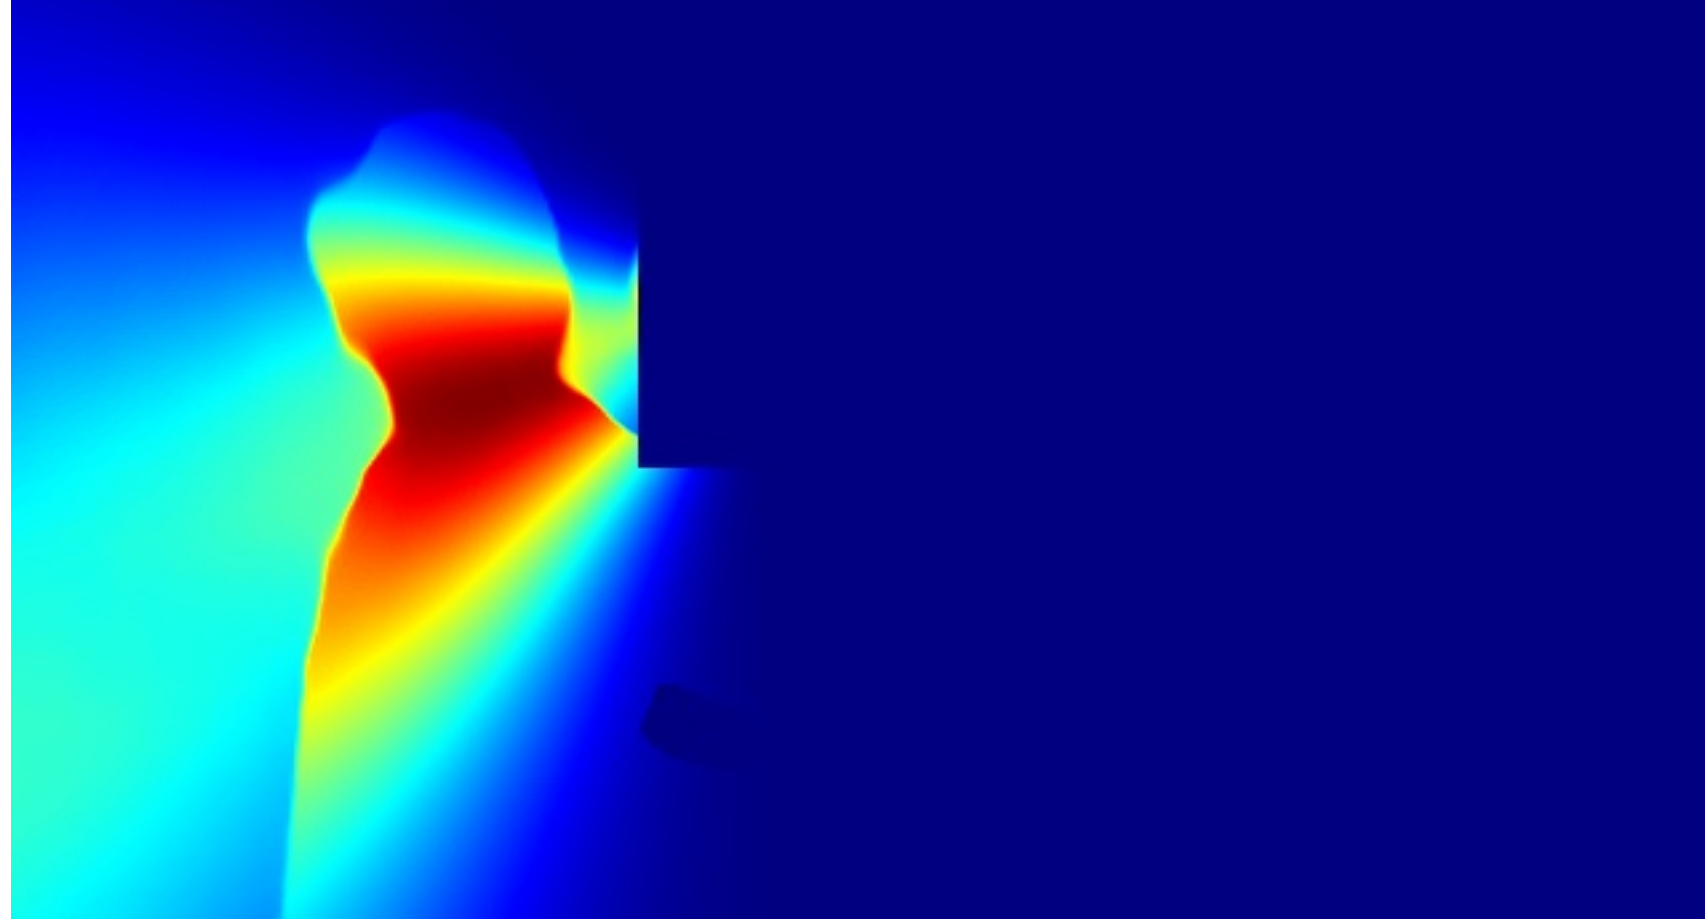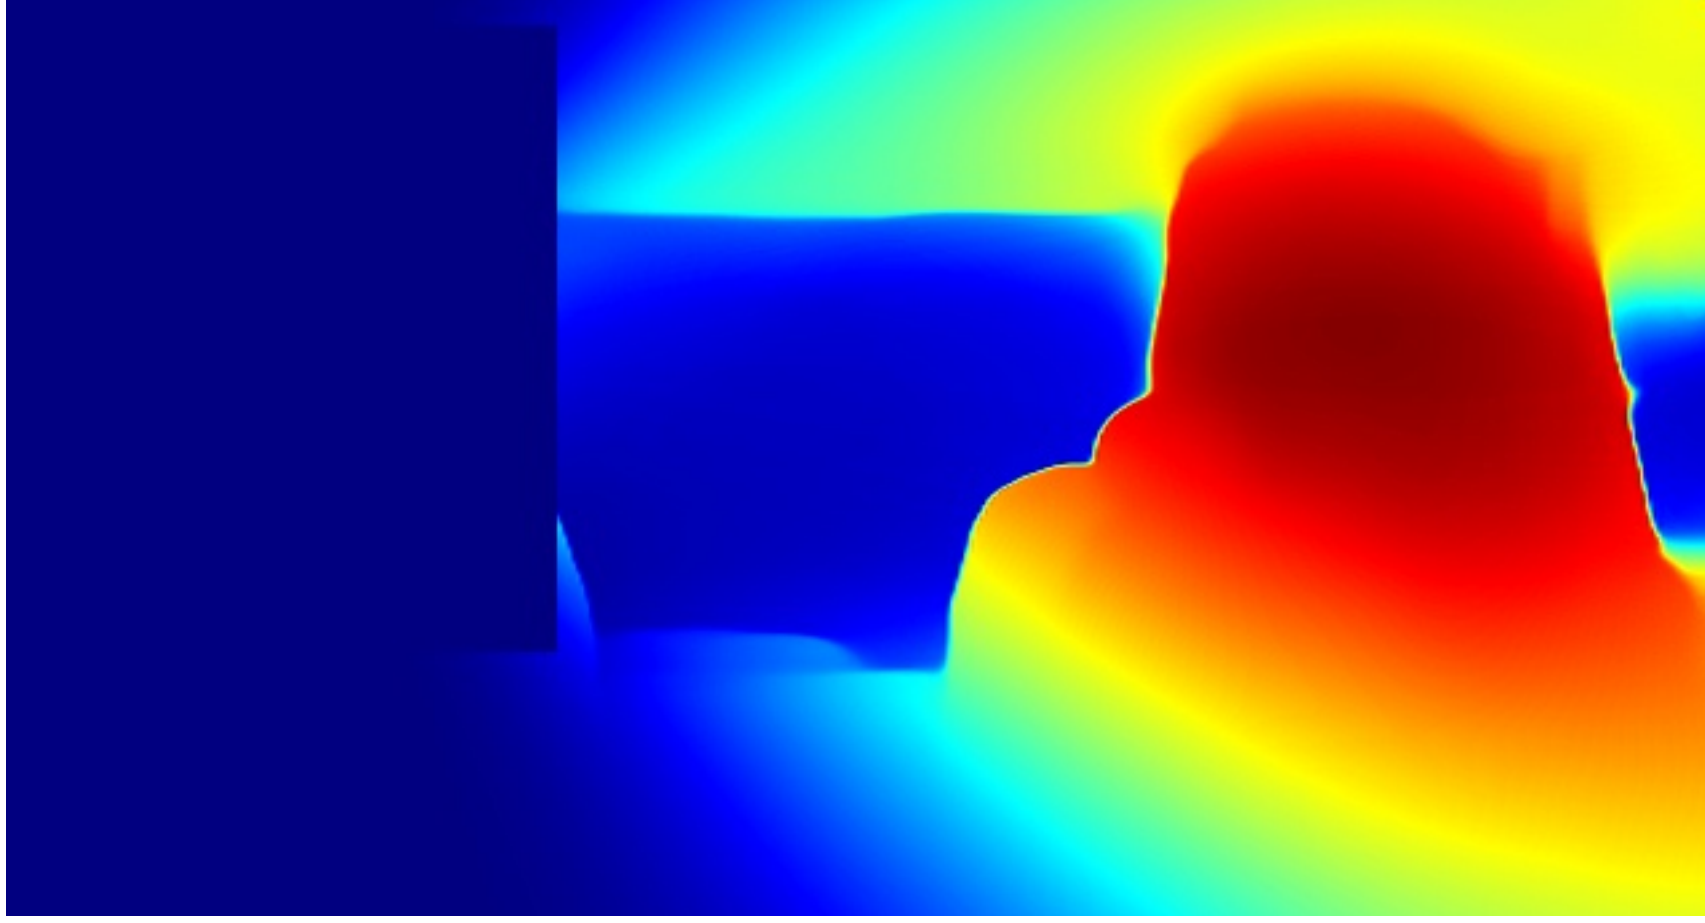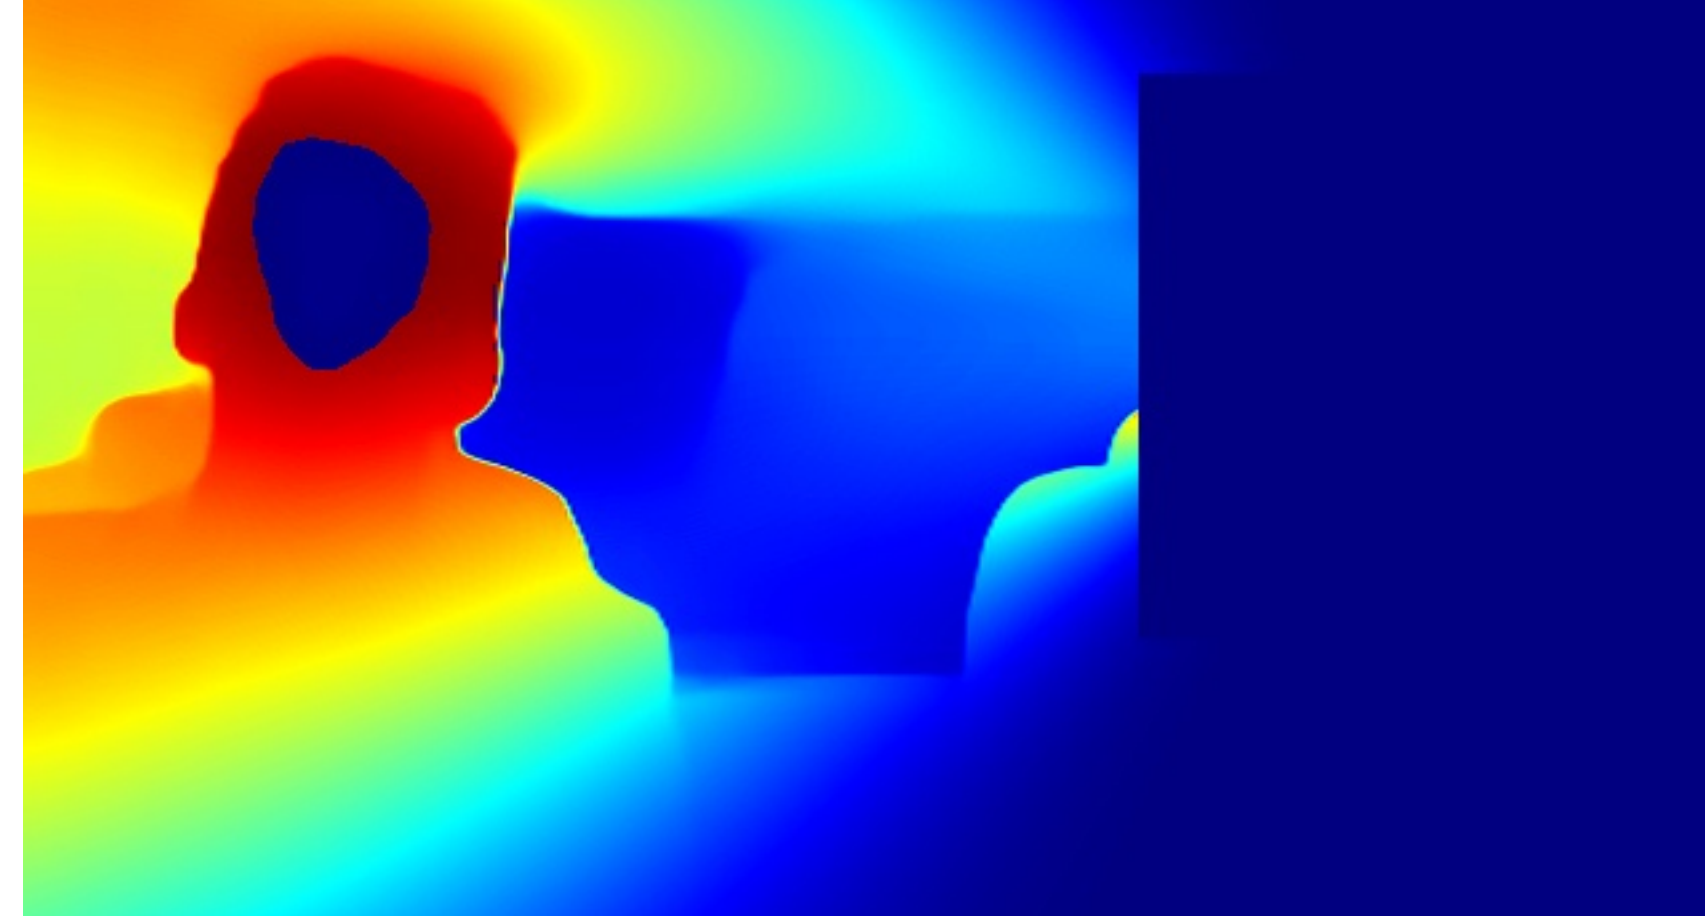

Supplement: supplementary_material [file attachment]

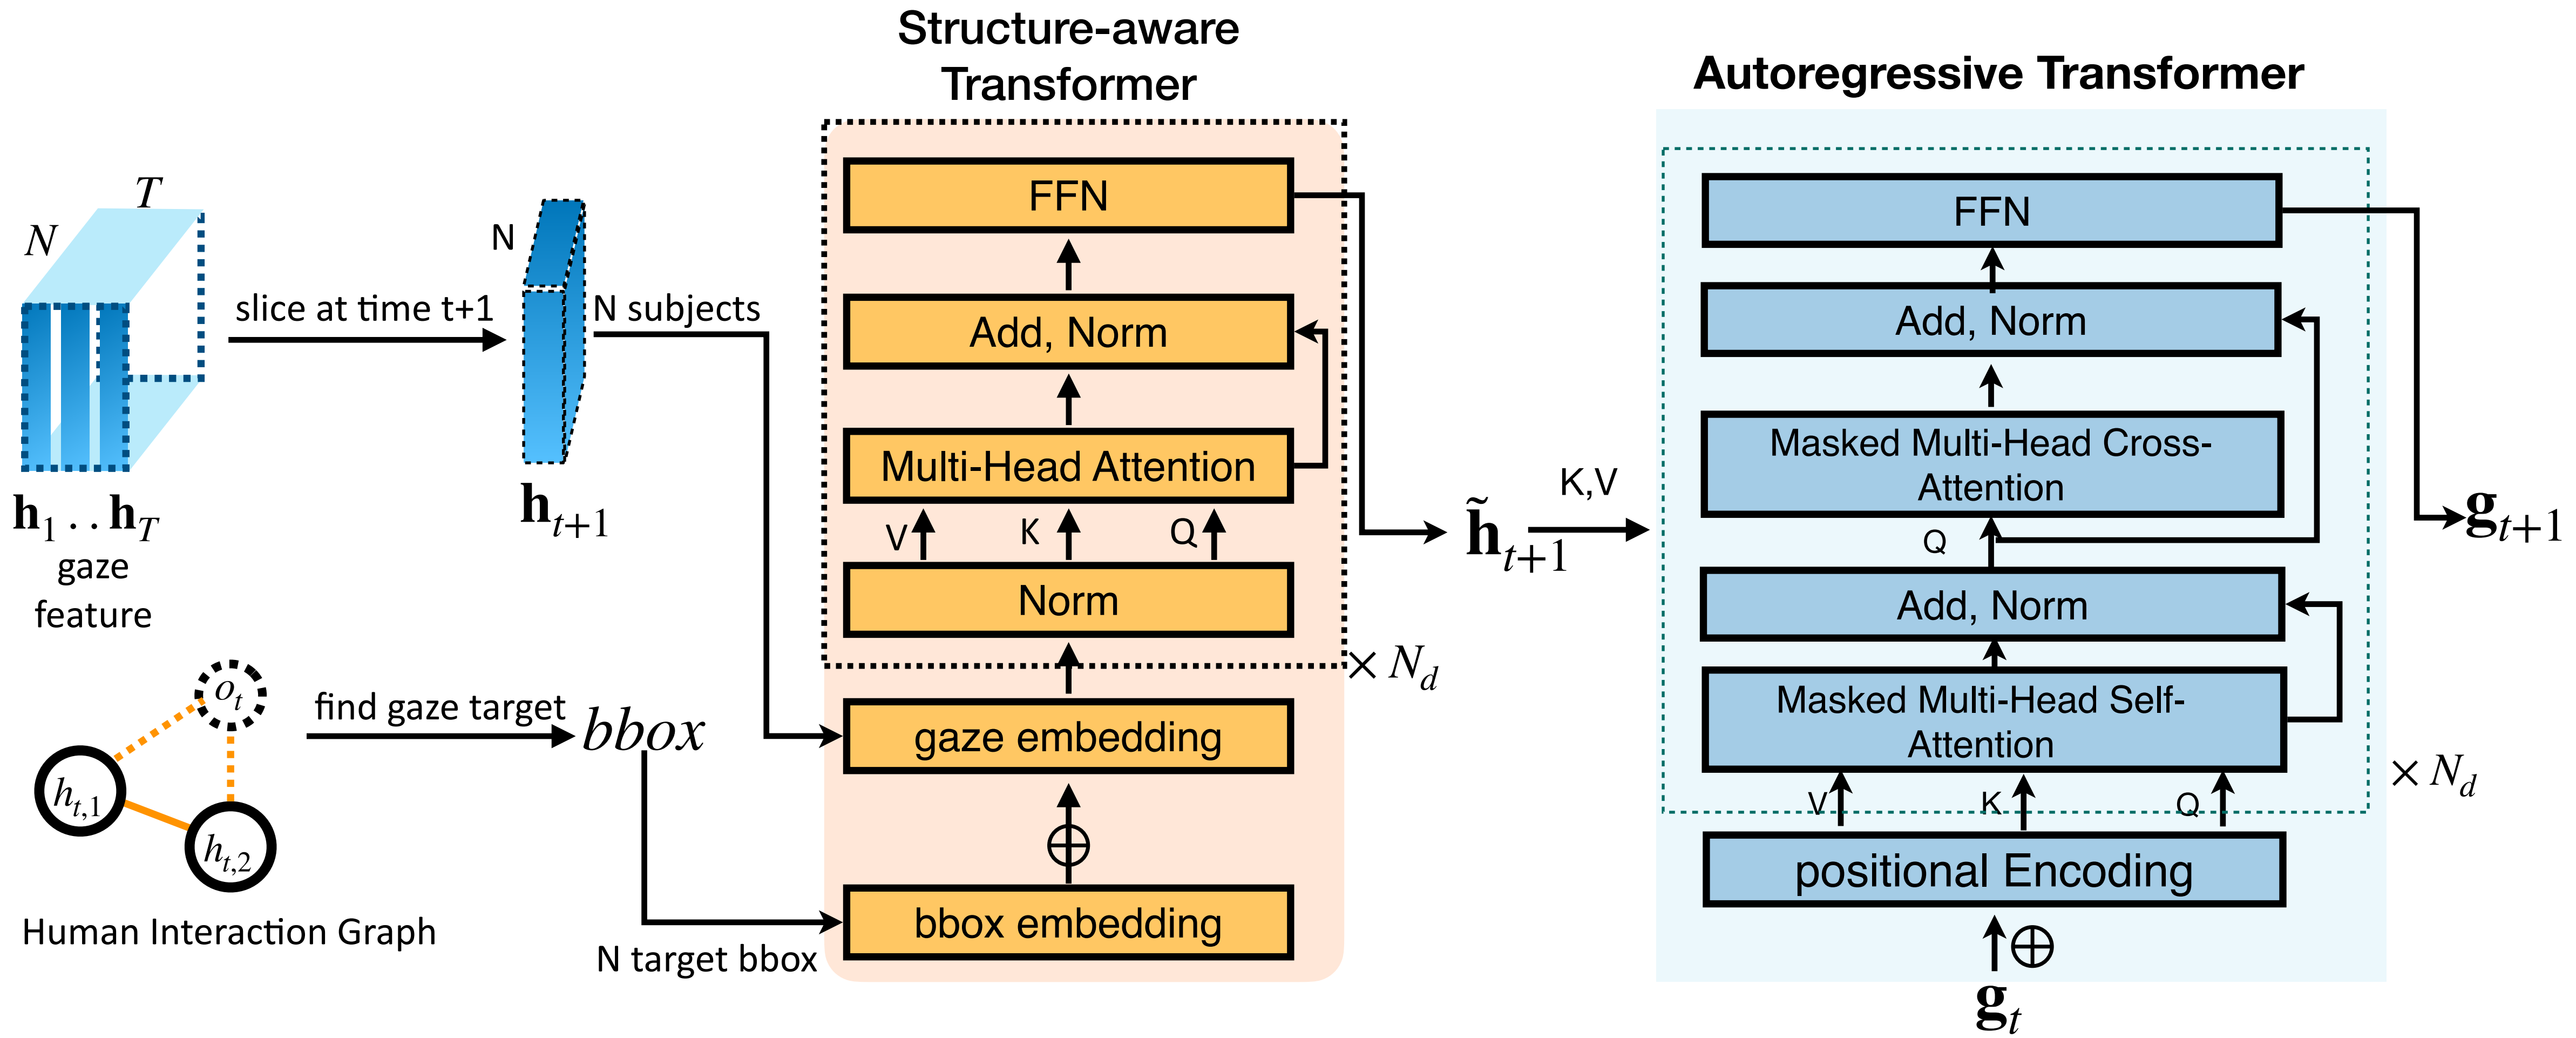

Supplement: supplementary_material [file attachment]

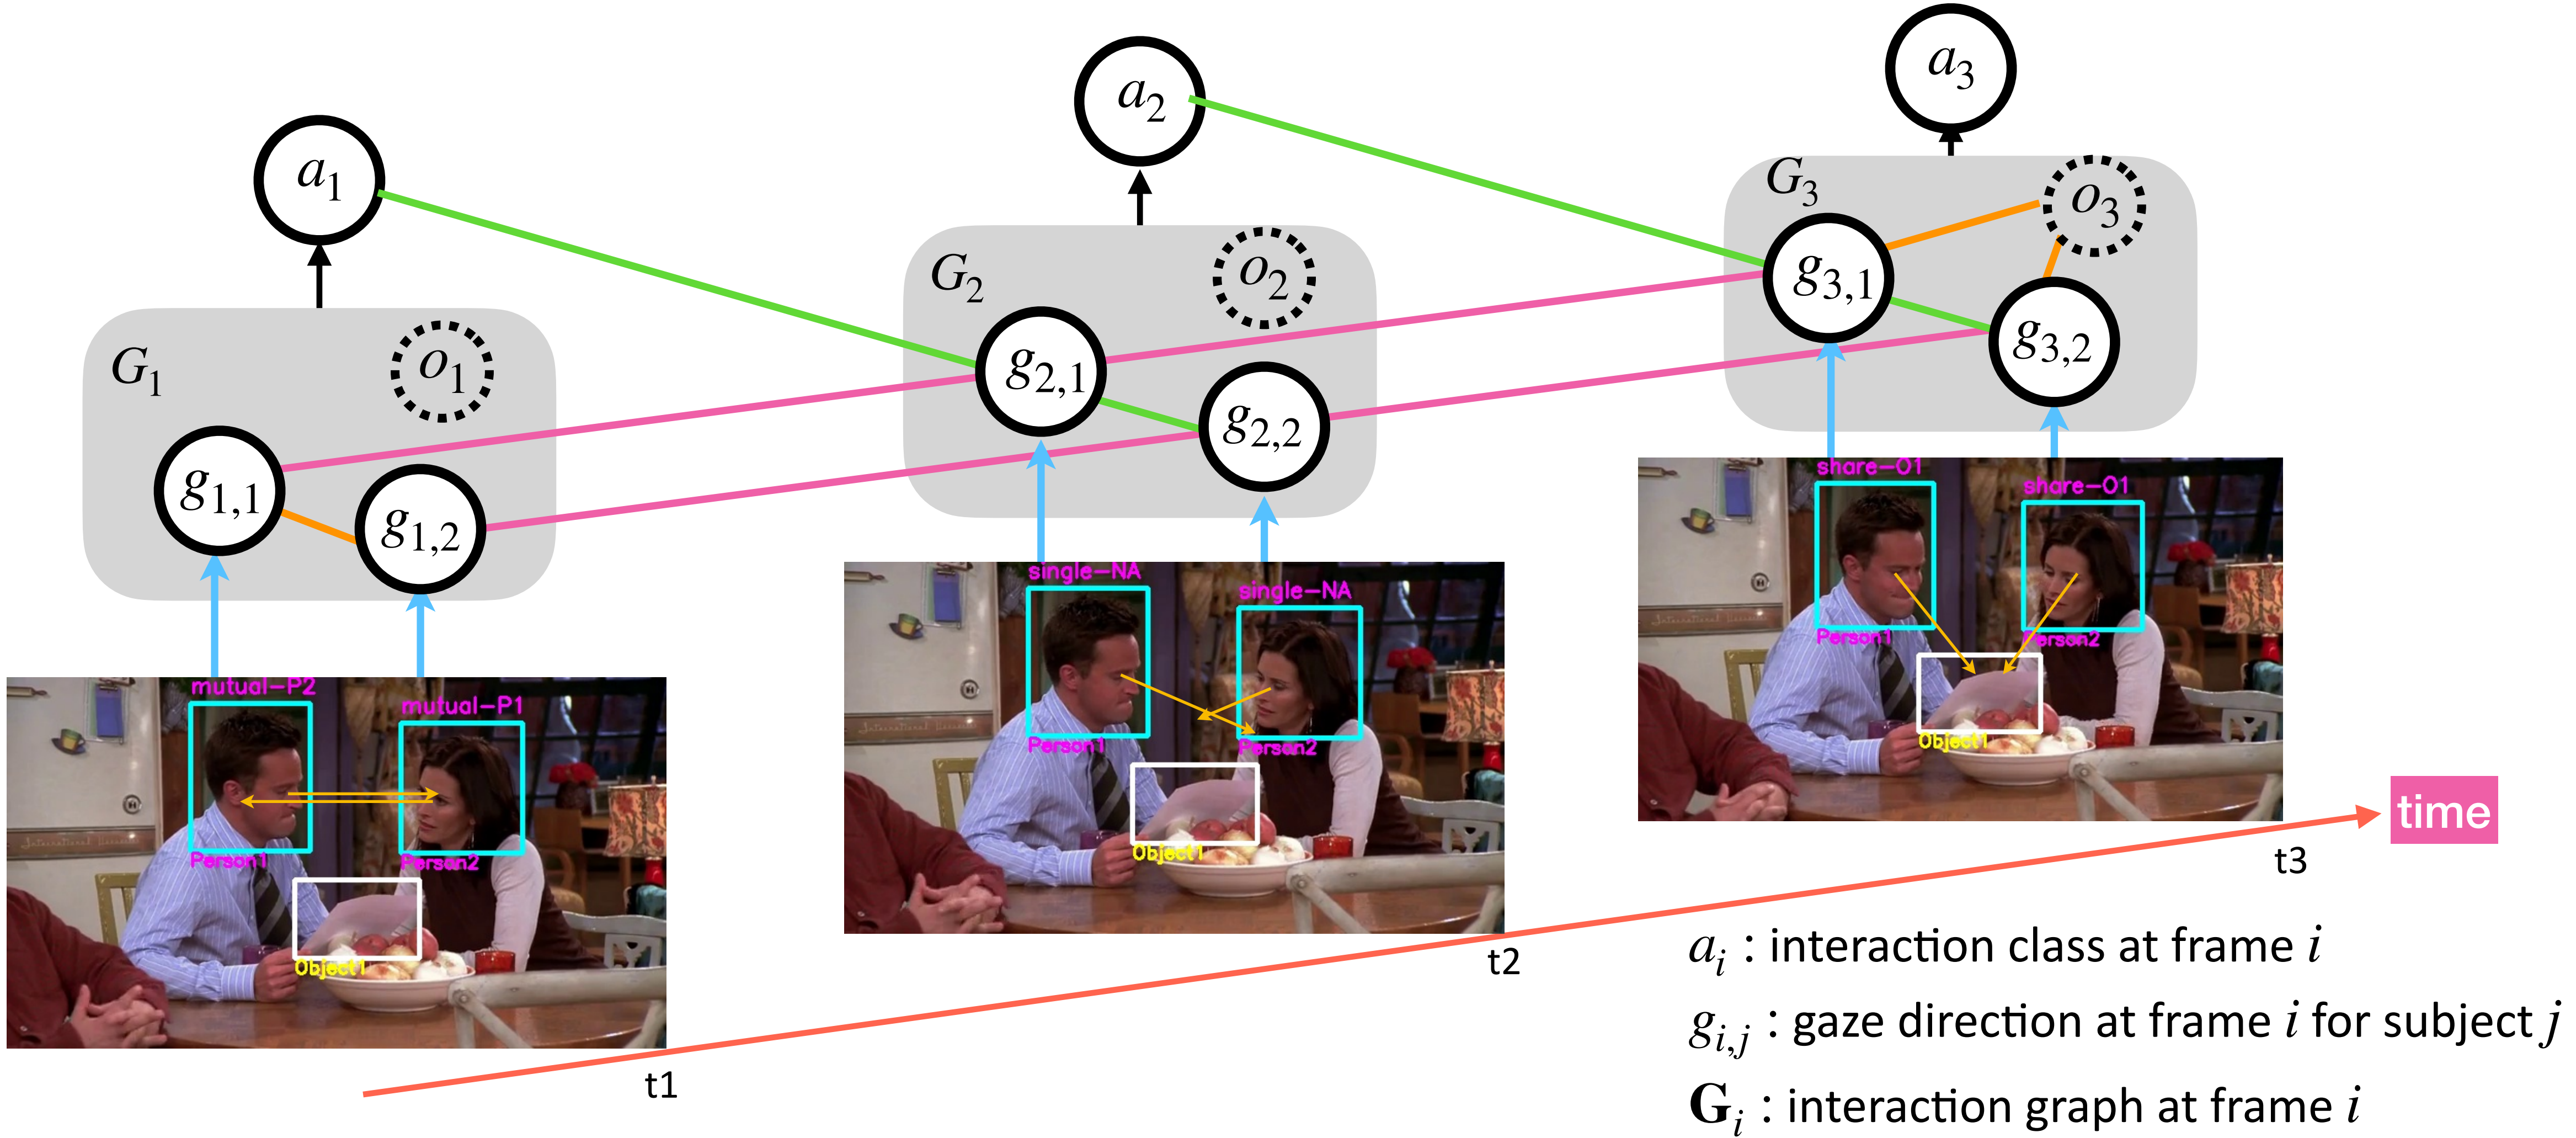

Supplement: supplementary_material [file attachment]

(a)

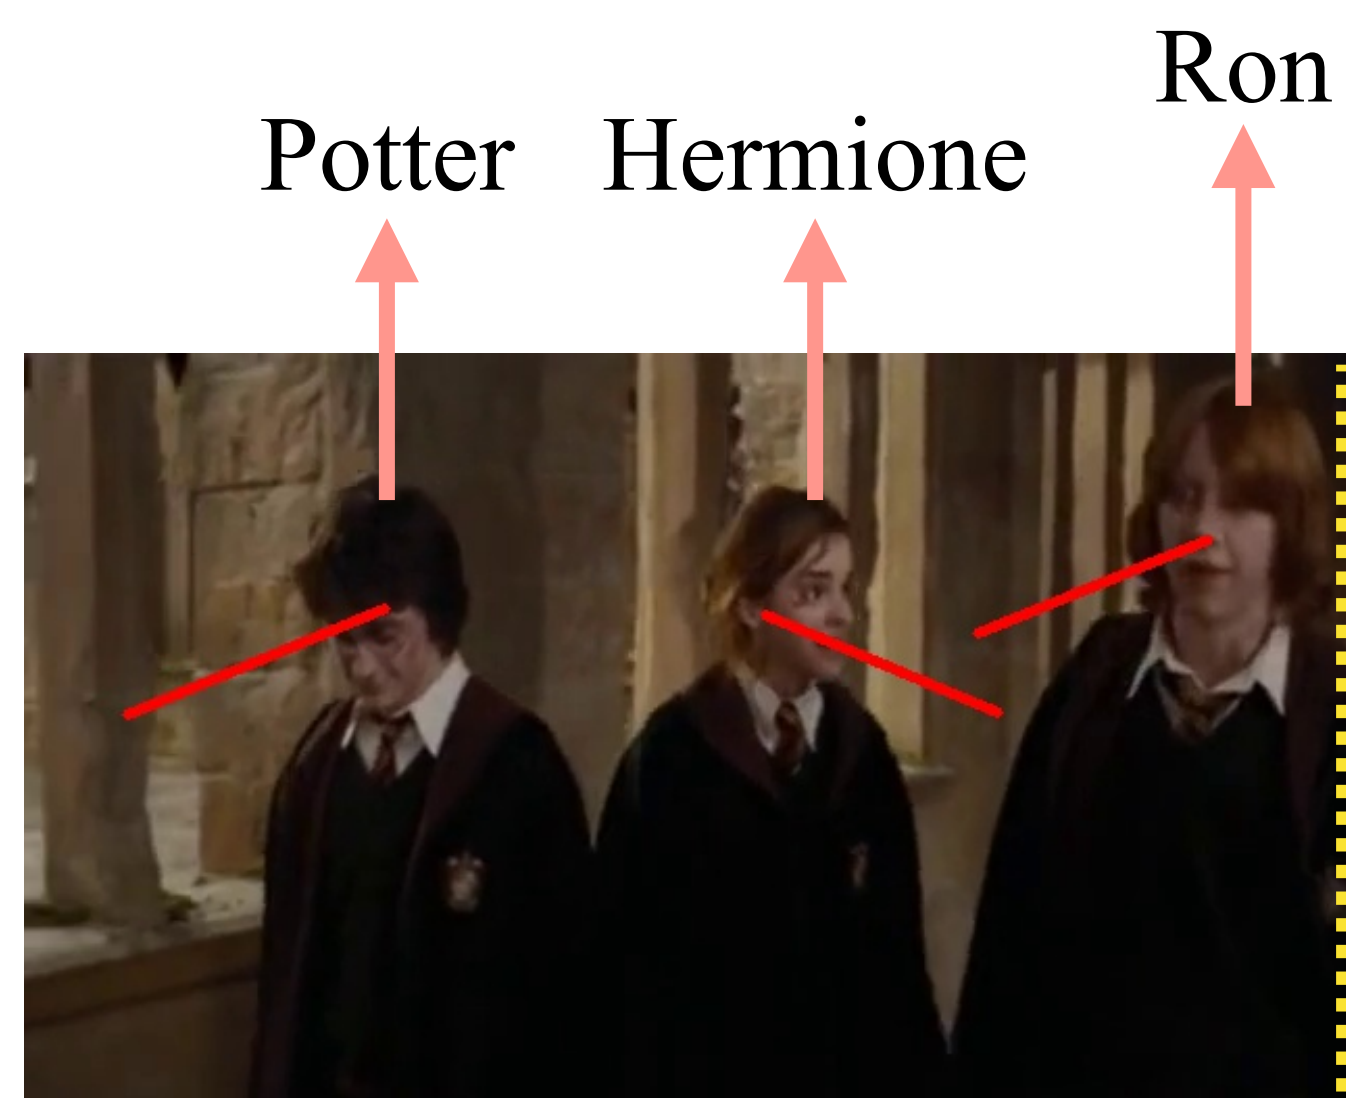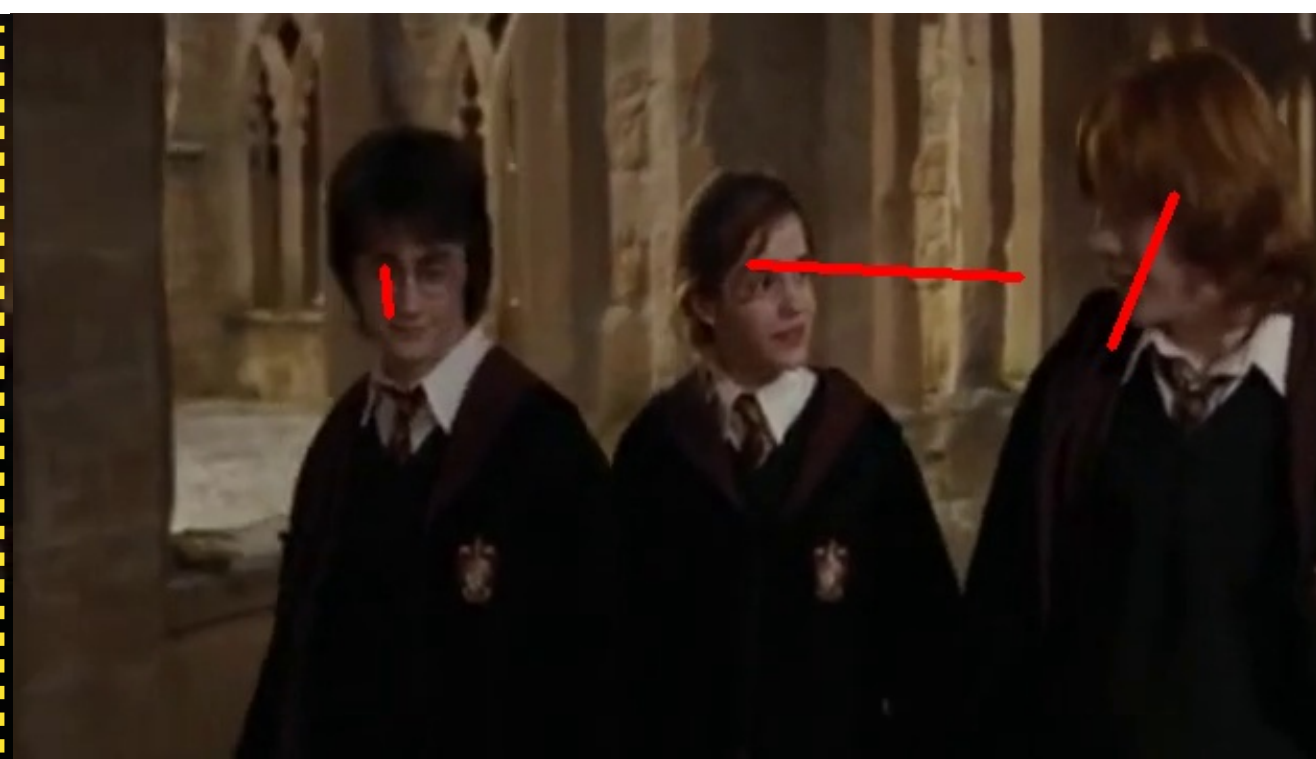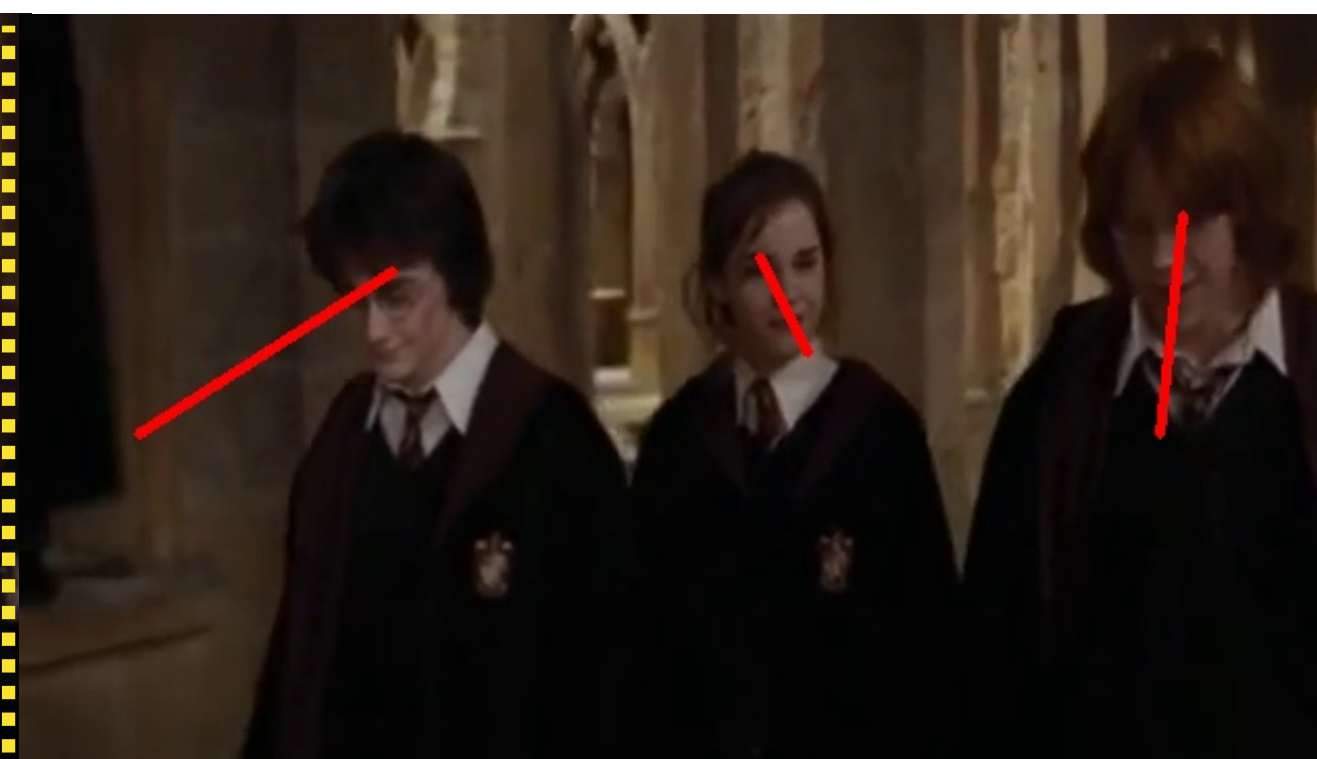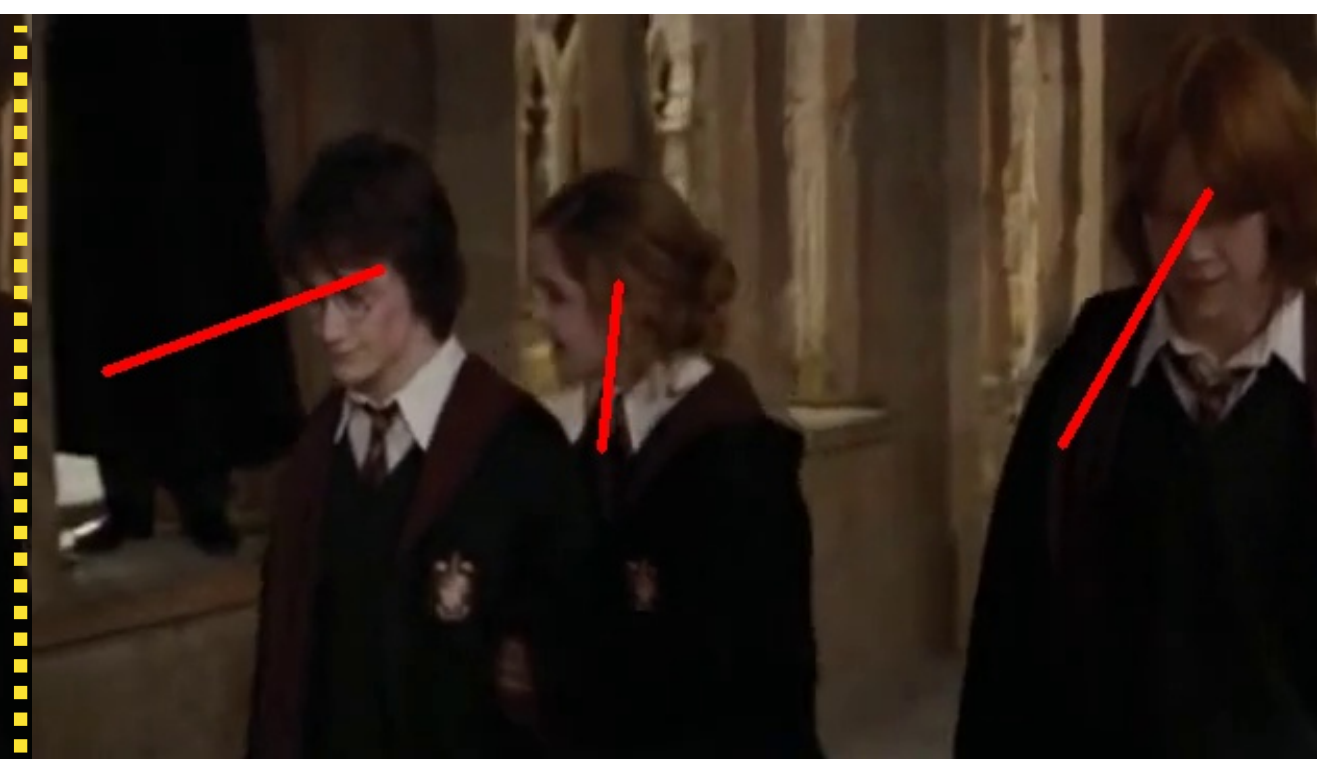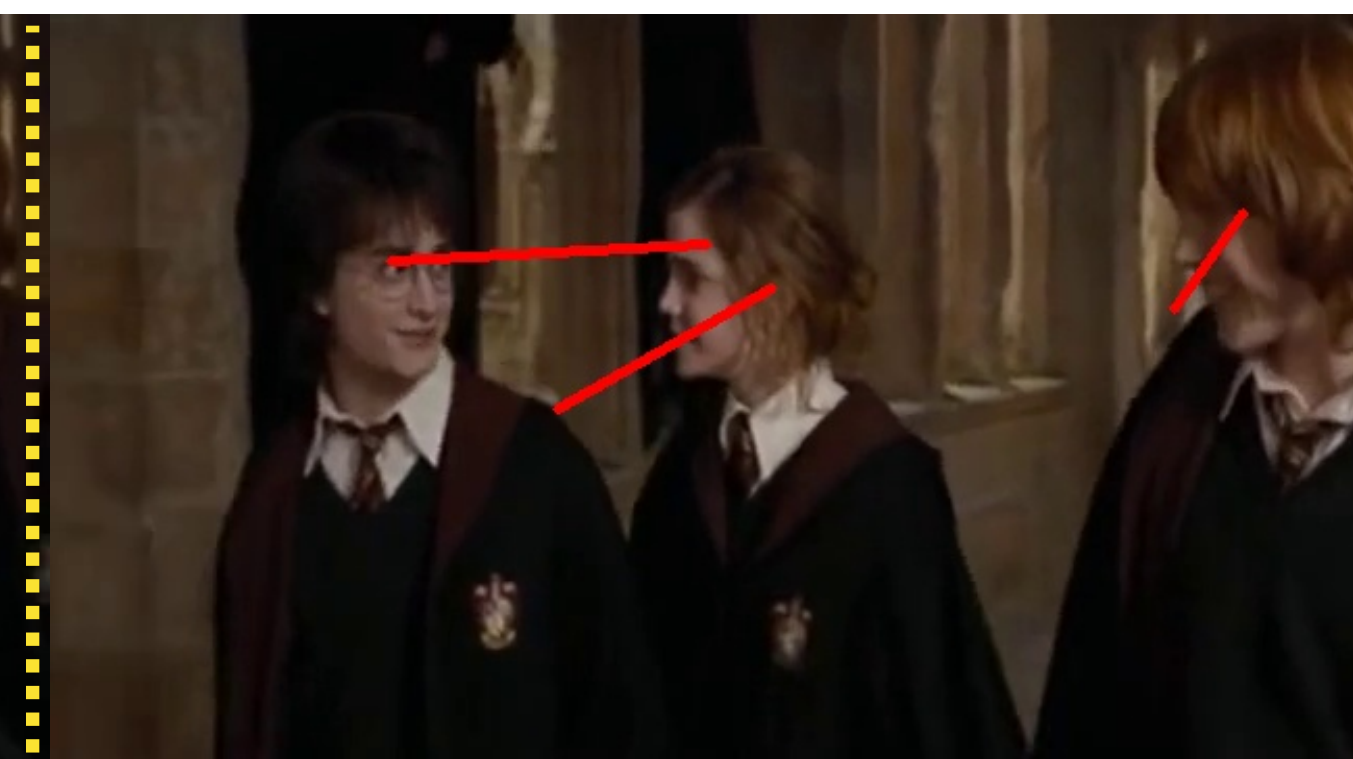

(b)

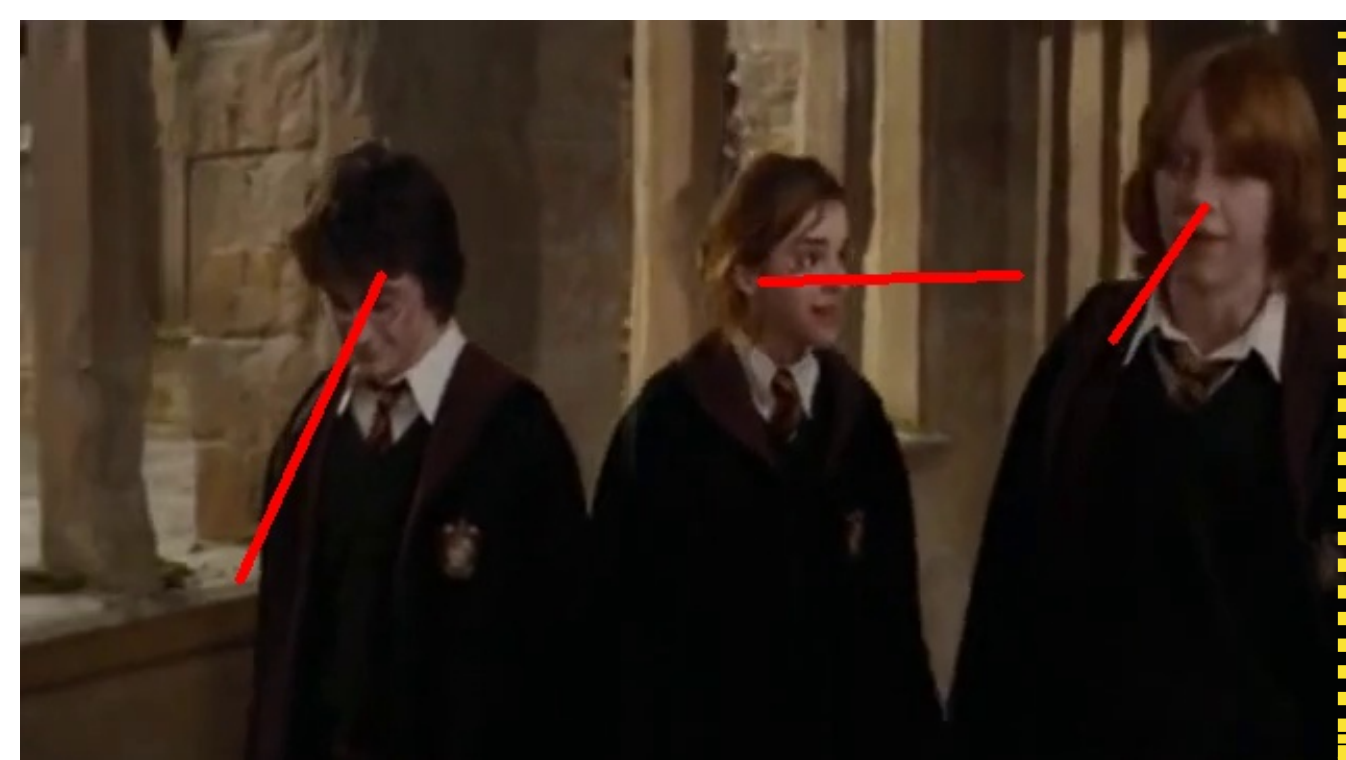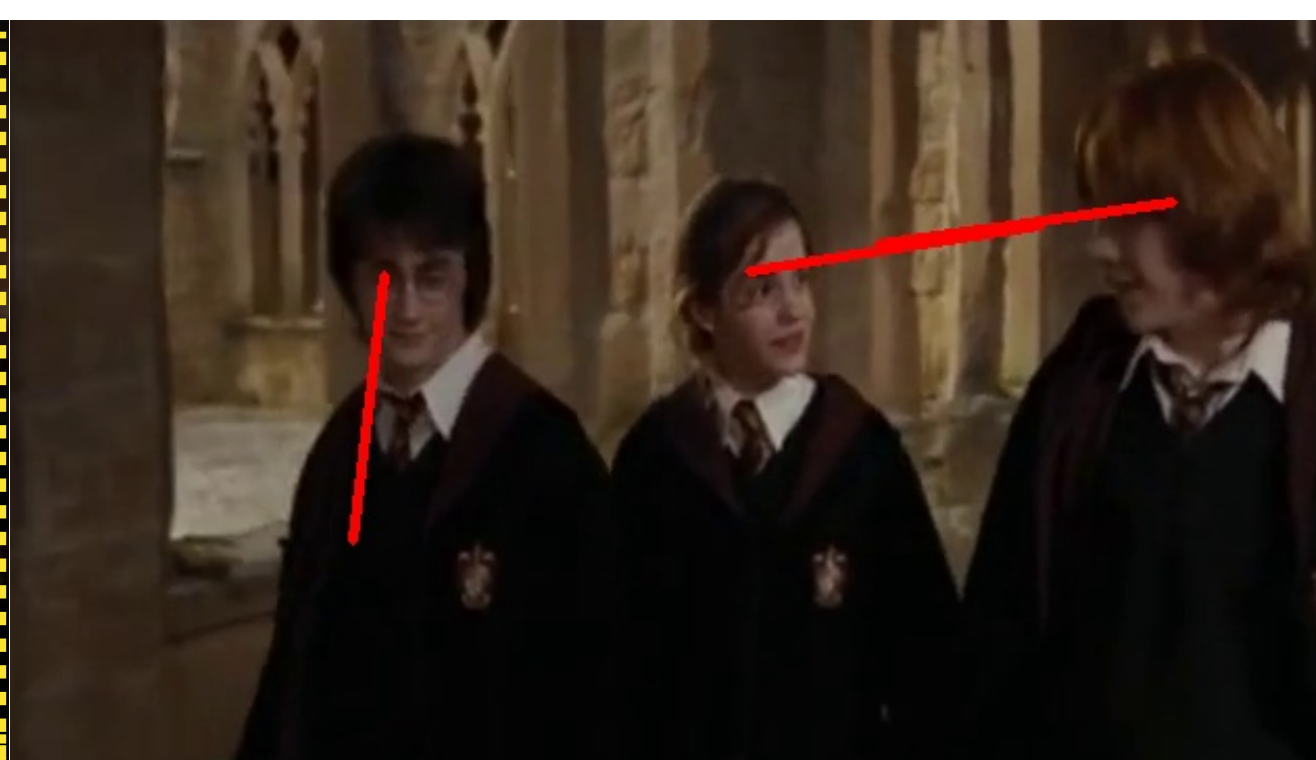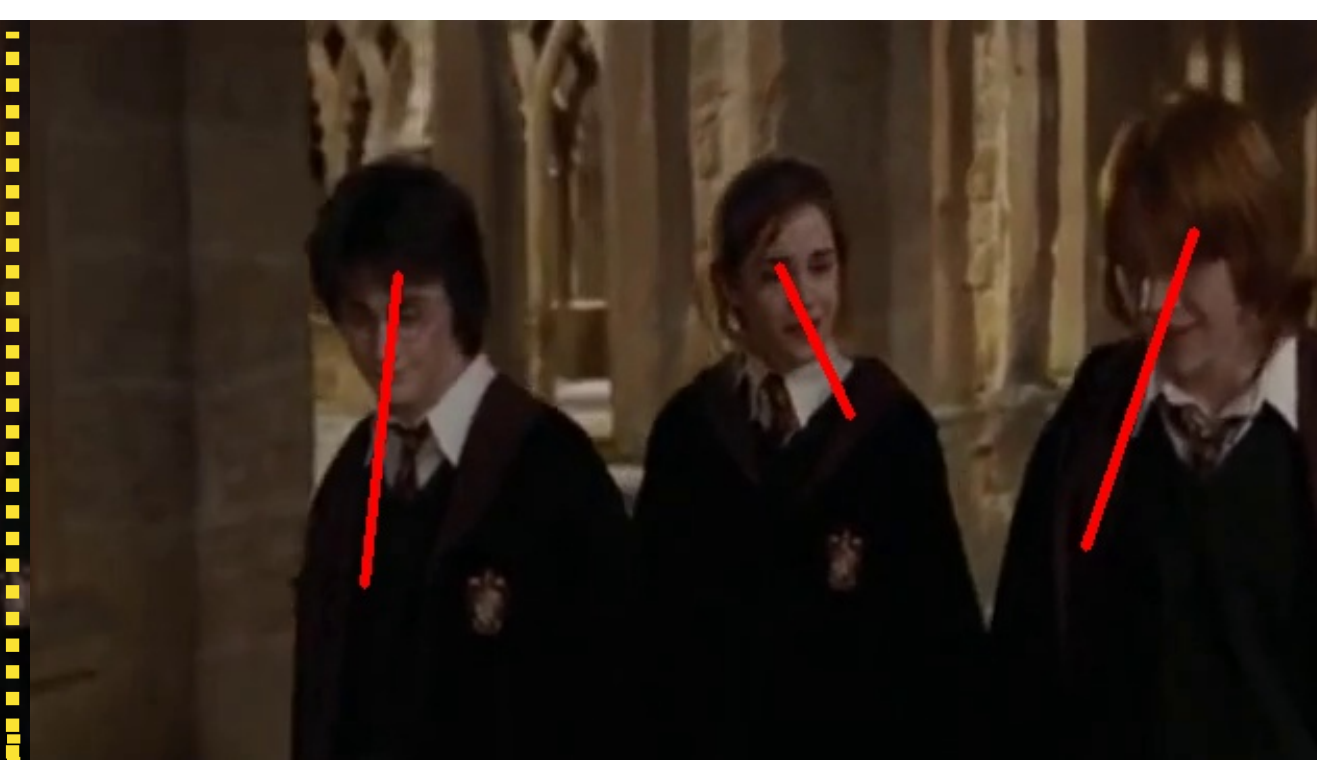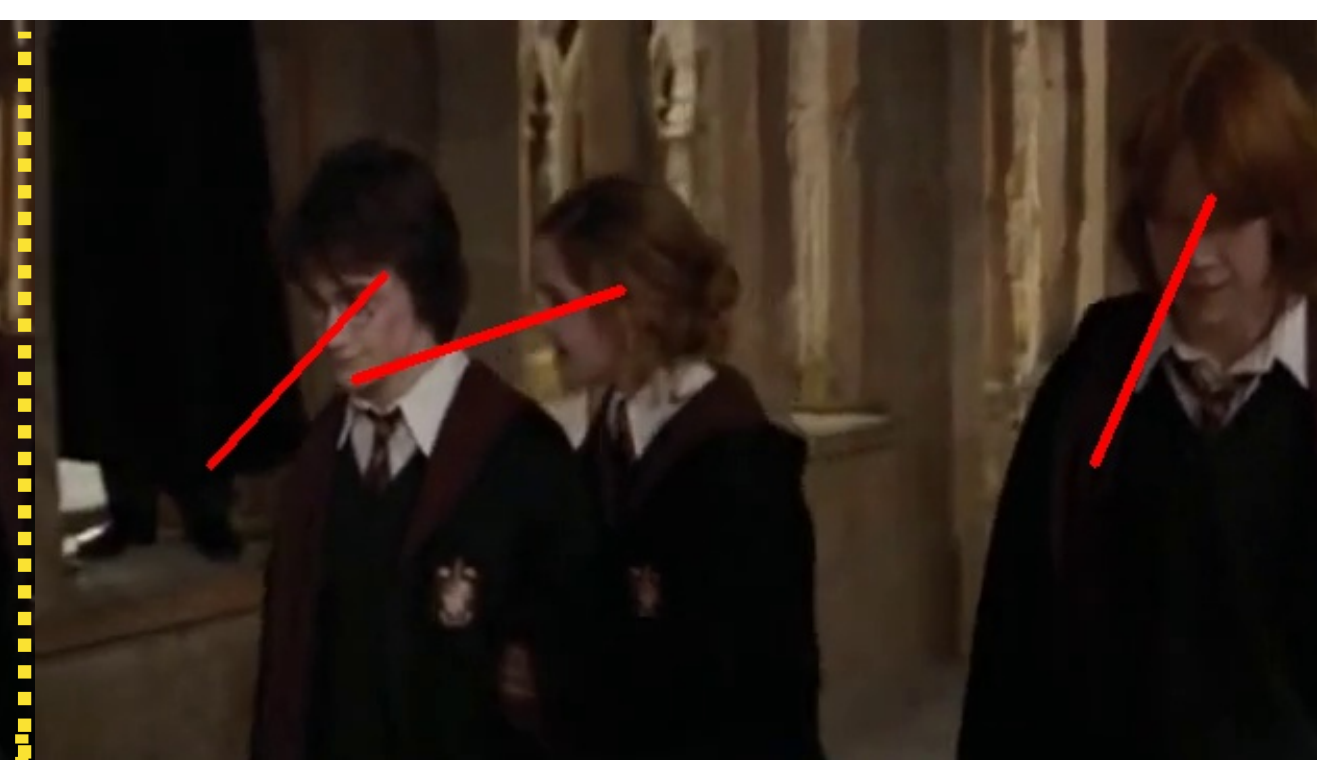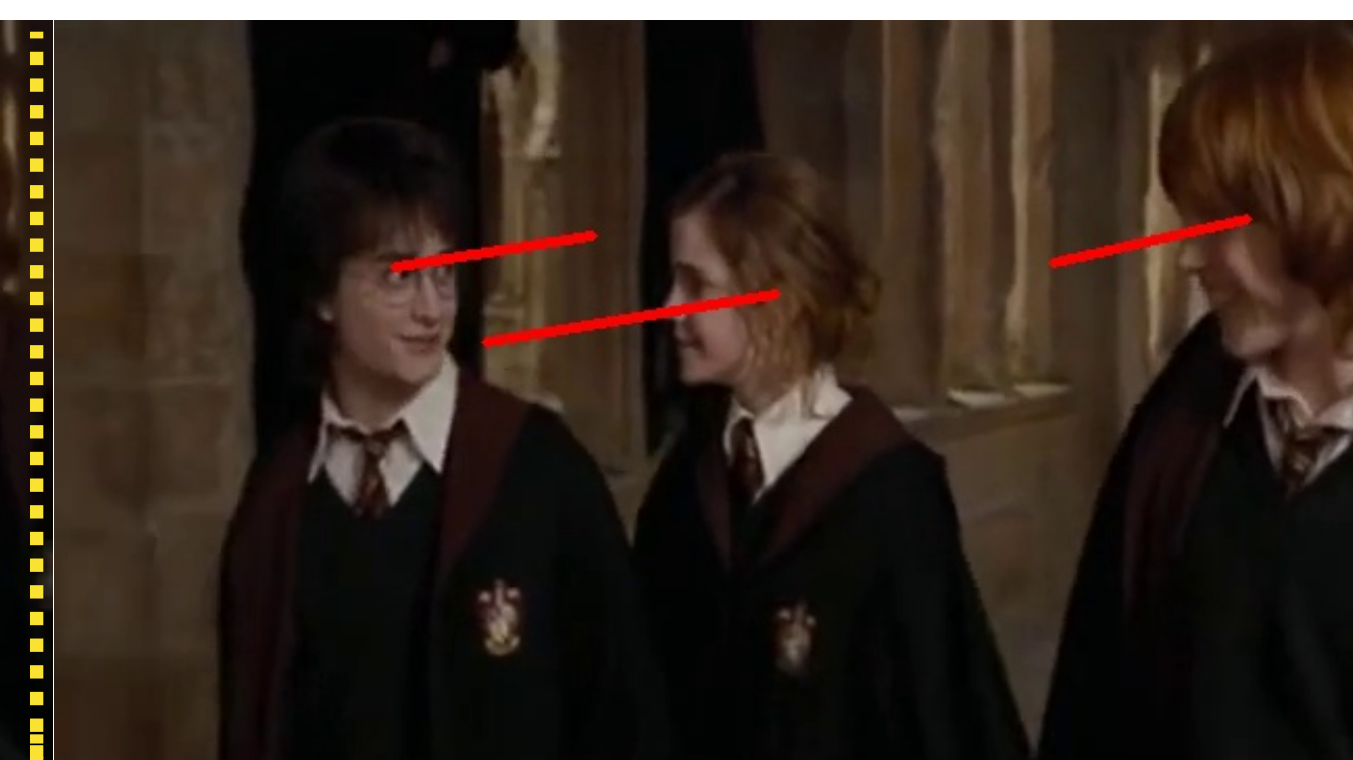

(c)

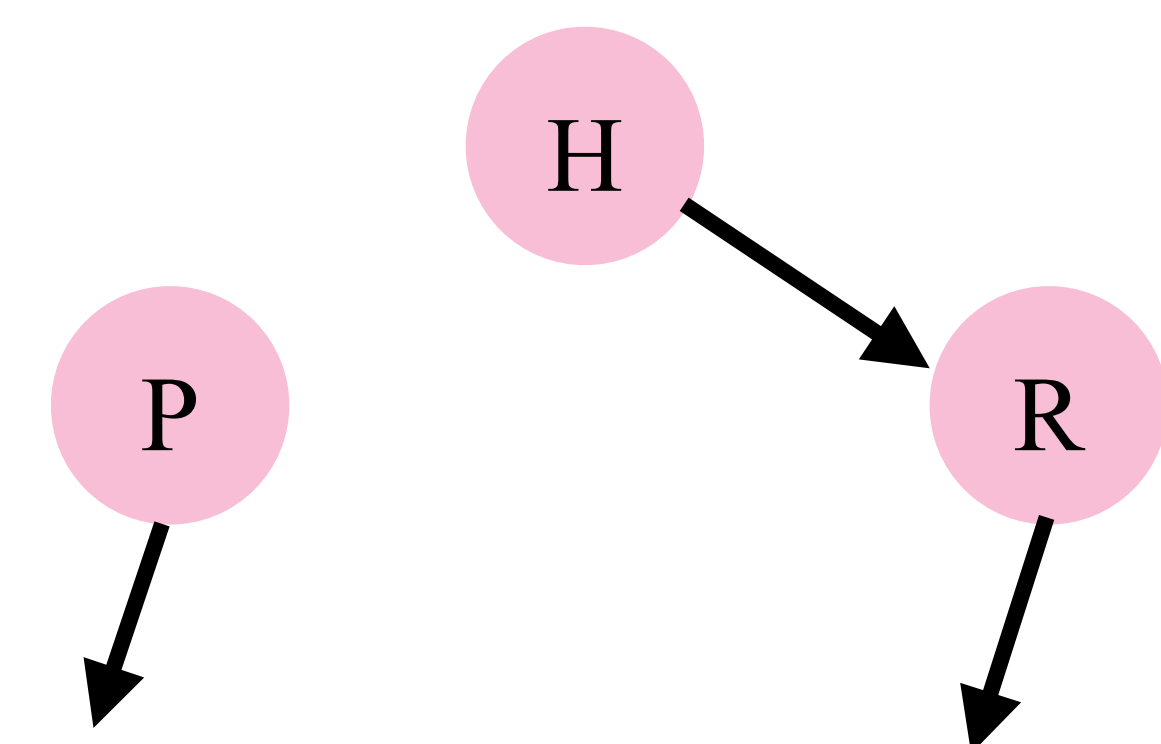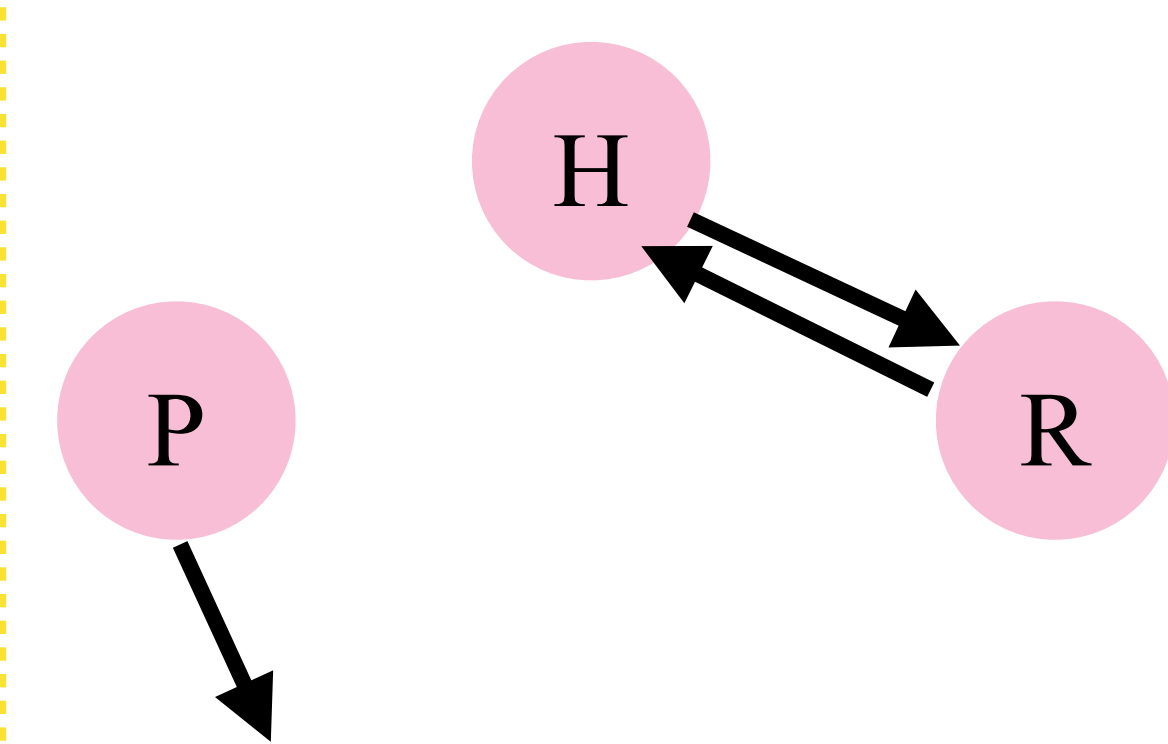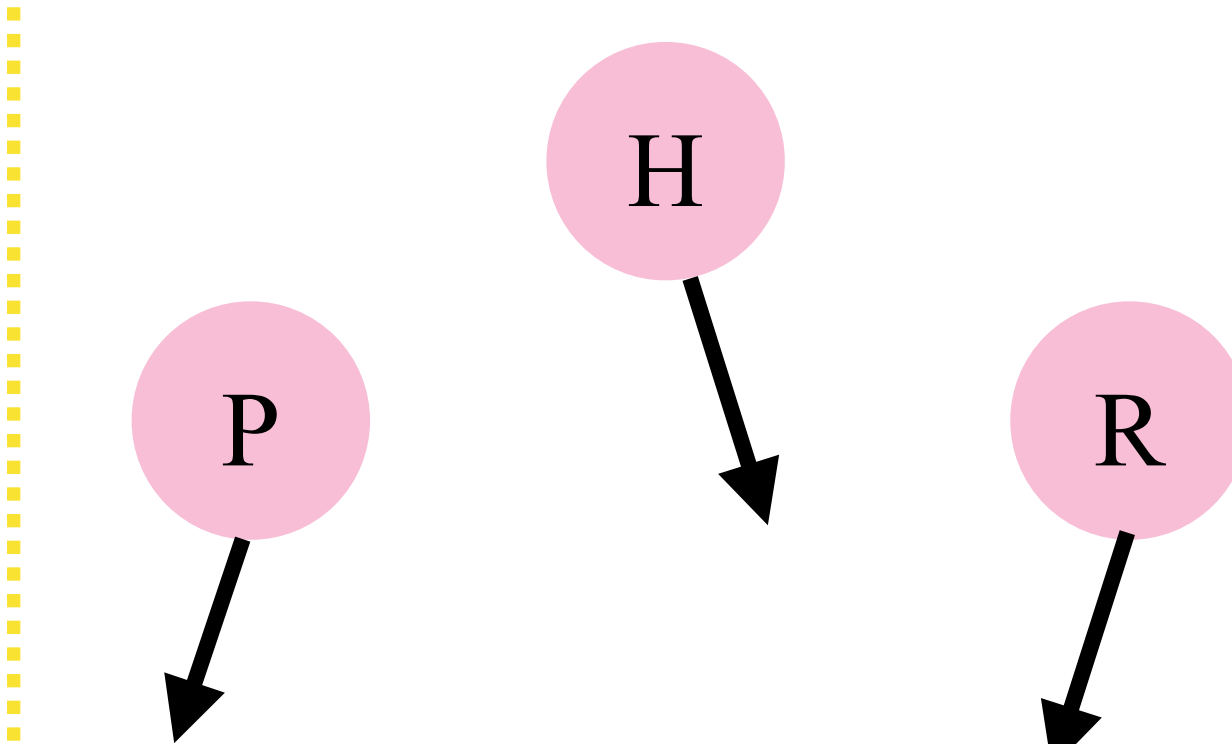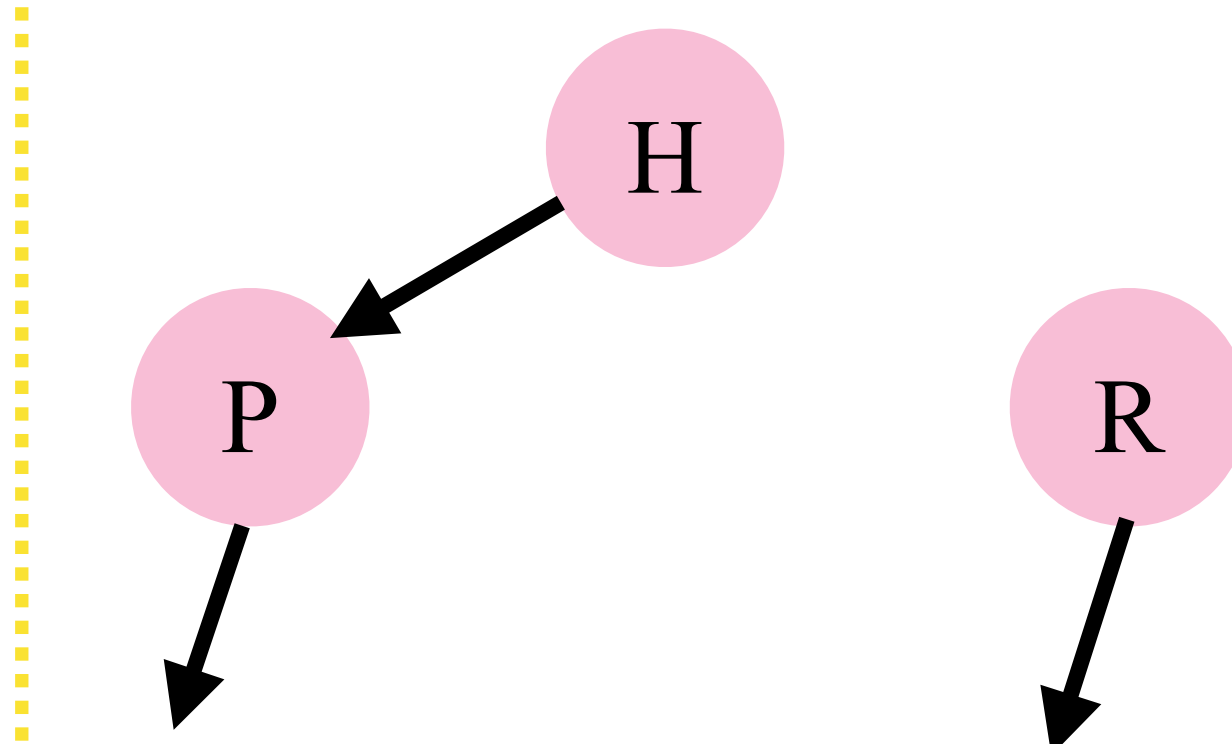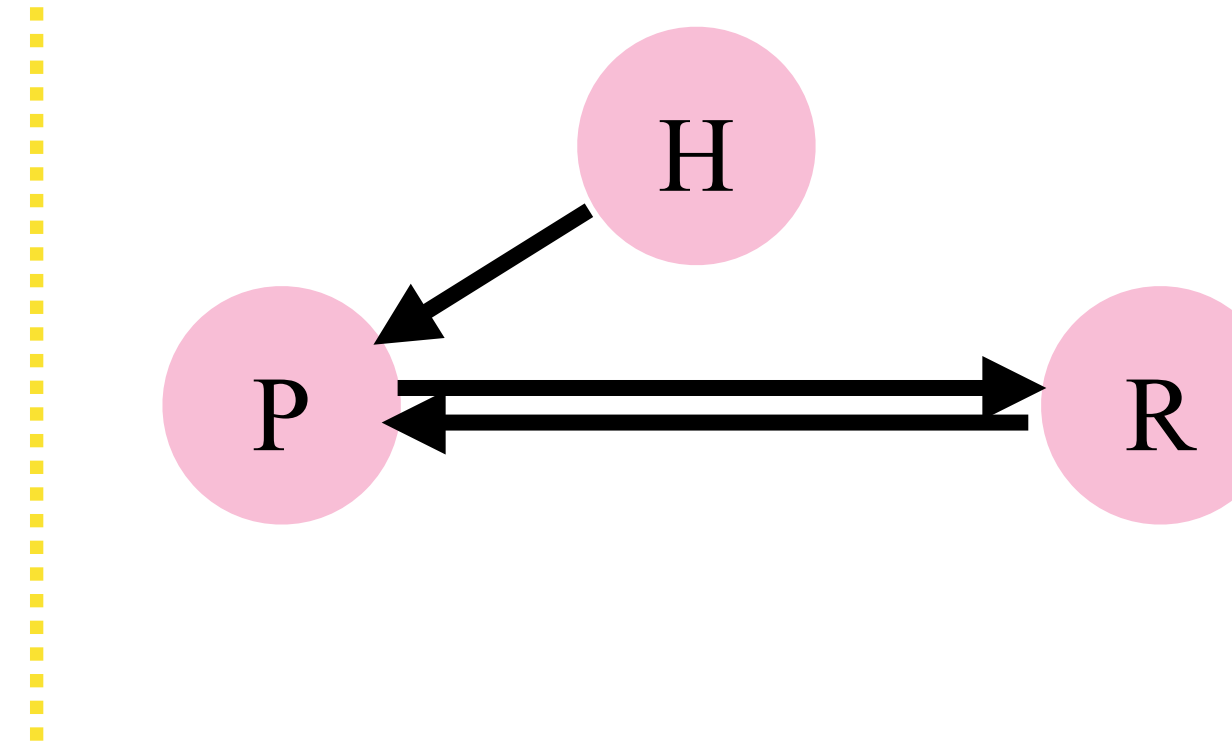

(d)

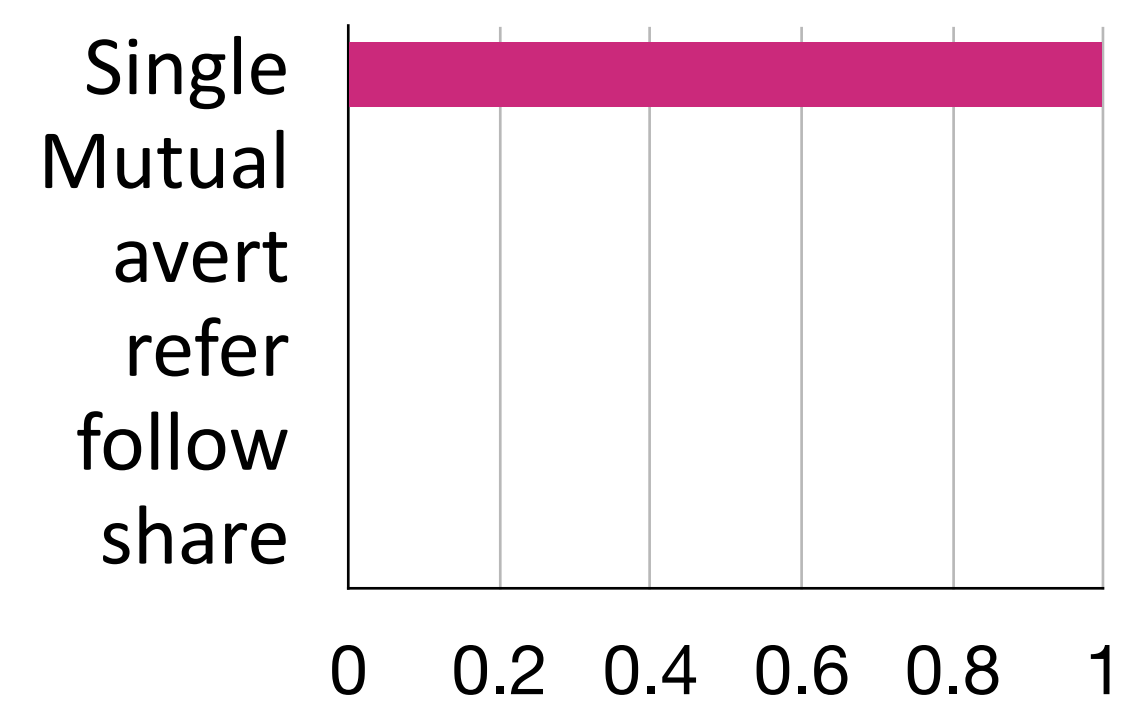

Node H

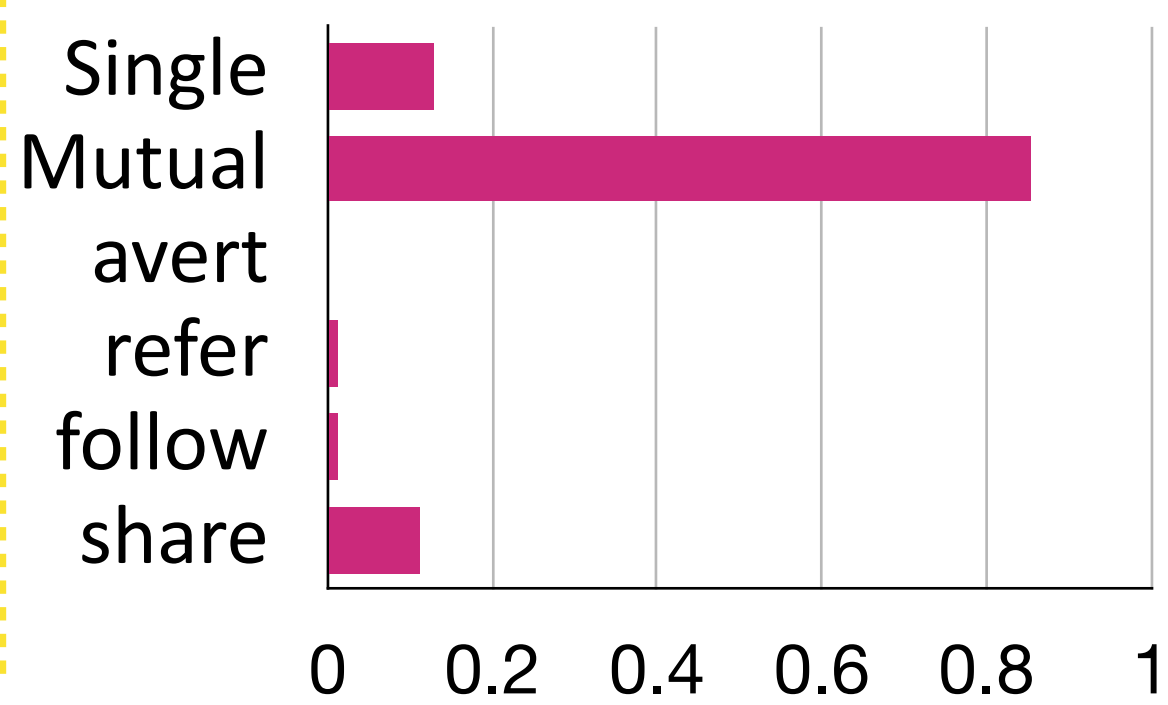

Node H

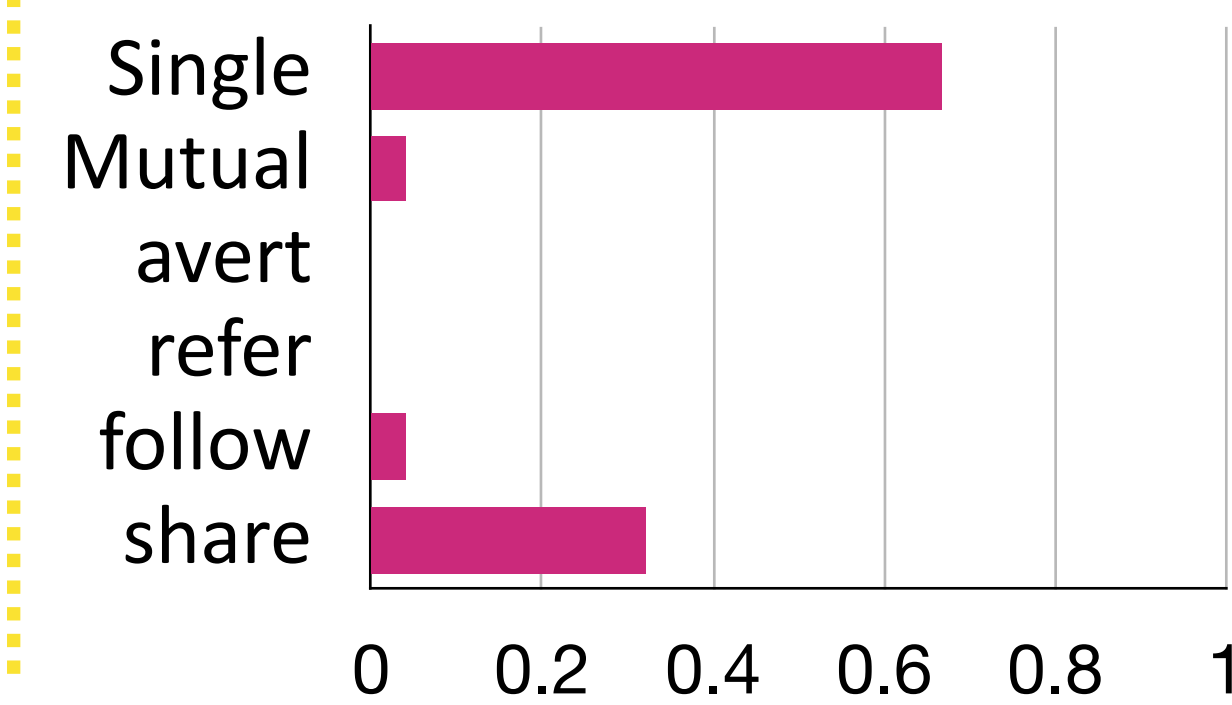

Node H

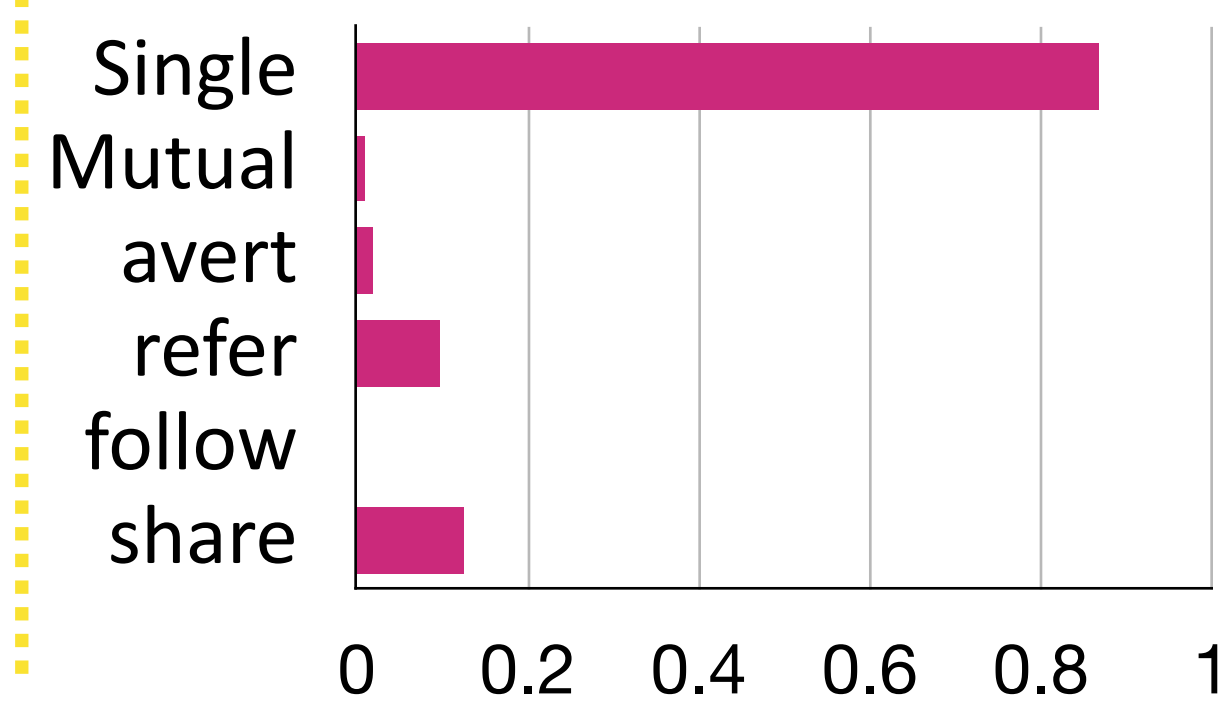

Node H

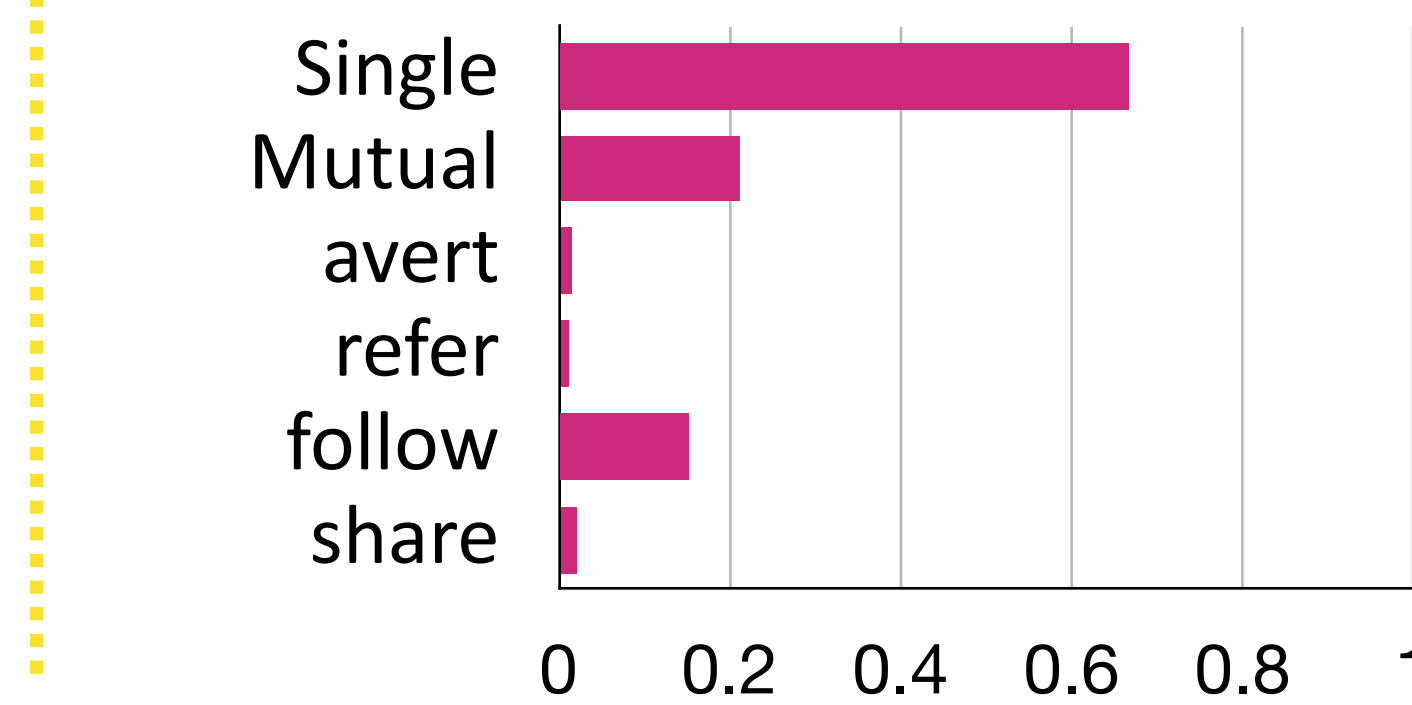

Node H

Supplement: supplementary_material [file attachment]
